1  
2  
3  
4  
5  
6  
7  
8  
9  
10  
11  
12  
13  
14  
15  
16  
17  
18  
19  
20  
21  
22  
23  
24

**PLANAR POLARIZATION OF CILIA IN THE ZEBRAFISH FLOOR PLATE INVOLVES Par3-MEDIATED POSTERIOR LOCALIZATION OF HIGHLY MOTILE BASAL BODIES.**

**Antoine Donati<sup>1</sup>, Sylvie Schneider-Maunoury<sup>1\*</sup> and Christine Vesque<sup>1\*</sup>**

<sup>1</sup> Sorbonne Université, CNRS UMR7622, INSERM U1156, Institut de Biologie Paris Seine (IBPS) - Developmental Biology Unit, 75005, Paris, France

\*co-senior authors, co-corresponding authors.

Keywords: planar cell polarity, cilium, basal body, zebrafish floor plate, Par3, Vangl2.

1 **ABSTRACT**

2  
3

4 To produce a directional flow, ciliated epithelia display a uniform orientation of ciliary  
5 beating. Oriented beating requires planar cell polarity (PCP), which leads to planar  
6 orientation and asymmetric positioning of the ciliary basal body (BB) along the  
7 polarity axis. We took advantage of the polarized mono-ciliated epithelium of the  
8 embryonic zebrafish floor plate (FP) to investigate by live-imaging the dynamics and  
9 mechanisms of BB polarization. We showed that BBs, although bearing a cilium,  
10 were highly motile along the polarity axis, contacting either the anterior or posterior  
11 membranes, exclusively at the level of apical junctions positive for Par3. Par3 was  
12 posteriorly enriched before BB posterior positioning and FP polarization was  
13 disrupted upon Par3 overexpression. In the PCP mutant *Vangl2*, BBs showed poorly  
14 oriented movements correlated with Par3 mislocalization. Our data lead us to  
15 propose a conserved function for Par3 in controlling BB asymmetric positioning  
16 downstream of the PCP pathway.

17  
18  
19

## 1 INTRODUCTION

2  
3 Cilia are conserved microtubule-based organelles with sensory and motile functions.  
4 Motile cilia generate forces sufficient to propel whole organisms or bodily fluids within  
5 cavities in animals: in respiratory airways to clear the mucus, in the oviduct to move  
6 gametes, in the embryonic laterality organ to establish left-right asymmetry, and in  
7 the central nervous system to propel the nutrient-rich cerebrospinal fluid (Wallingford  
8 2010; Meunier & Azimzadeh, 2016). In order to generate a directional flow, ciliated  
9 epithelia display a uniform orientation of ciliary beating, which is a form of planar cell  
10 polarity (PCP). Oriented beating of a cilium usually involves two PCP processes: the  
11 off-centering of the cilium basal body (translational polarity, in monociliated epithelia  
12 and ependymal cells) and the orientation of its beating relative to the main tissue axis  
13 (rotational polarity) (Wallingford 2010).

14 In many vertebrate ciliated tissues such as the mouse cochlea and ependyma, the  
15 laterality organ of mouse and zebrafish, the *Xenopus* larval skin and the zebrafish  
16 floor plate, cilium polarity requires the PCP pathway. In these tissues, PCP proteins  
17 such as Van Gogh like 2 (Vangl2), Frizzled (Fz3/6), Cadherin EGF LAG seven-pass  
18 G-type receptors (Celsr1-3) and Dishevelled (Dvl1-3), localize asymmetrically in  
19 ciliated epithelia, and are required for proper cilia/BB positioning (Montcouquiol et al.,  
20 2003, Mitchell et al., 2009, Borovina et al., 2010, Mirzadeh et al., 2010, Song et al  
21 2010, Boutin et al., 2012). Outside the PCP pathway, the cellular and molecular  
22 mechanisms of BB positioning remain poorly understood. Non-muscle myosin II is  
23 required for ependymal translational polarity in murine ependymal multiciliated cells  
24 (Hirota et al., 2010) and the murine Myosin Id mutant exhibit defects in both  
25 translational and rotational polarity in these cells (Hegan et al., 2015). Translational  
26 polarity has been shown to require Rac1 in monociliated cells of the mouse node and  
27 cochlea (Hashimoto et al., 2010; Grimsley-Myers et al., 2009) and G protein  
28 signalling in cochlear hair cells (Ezan et al., 2013; Tarchini et al., 2013). Ciliary  
29 proteins themselves have been involved in planar polarization of cilia in several  
30 contexts (Ross et al., 2005; Jones et al., 2008; Mirzadeh et al., 2010; Mahuzier et al.,  
31 2012; Ohata et al., 2015). However, the relationships between these different actors  
32 and how they impact basal body movement is unclear.

1 Understanding the mechanisms of cilium polarization would highly benefit from a  
2 dynamic analysis of BB movements. A major drawback is the difficulty to follow the  
3 dynamics of BB polarization *in vivo* in whole embryos, or to reproduce PCP and  
4 cilium polarization *in vitro* in cultured cells. So far, live imaging of cilium polarization  
5 has been performed only in cochlear explants where only confined Brownian motion  
6 of centrioles was observed (Lepelletier et al., 2013) and in the mouse node  
7 (Hashimoto 2010) and ependyma (Hirota 2010) with very limited temporal resolution.  
8 In this paper, in order to get a better understanding of the mechanisms leading to BB  
9 off-centering in epithelia, we have used the zebrafish embryonic floor-plate (FP) as a  
10 convenient system to investigate the dynamics of the polarization process in live  
11 embryos. The FP is a simple mono-ciliated epithelium whose posterior-positioned  
12 motile cilia allow circulation of the embryonic CSF in an anterior to posterior fashion.

13 Our results show that planar polarization of BBs and their associated cilia is  
14 progressive during somitogenesis and is accompanied by a change in the behavior of  
15 the BBs, which are highly motile at early stages and tend to spend an increasing  
16 amount of time in contact with the posterior membrane as development proceeds.  
17 We found that BBs always contacted membranes at the level of Par3-enriched apical  
18 junctions. Par3 became enriched at the posterior apical side of FP cells before BB  
19 polarization. Par3 overexpression disrupted FP polarization and its localization was  
20 disrupted in a *Vangl2* mutant. Thus, we propose that a major role of the PCP  
21 pathway in the FP is to drive Par3 asymmetric localization, which in turn mediates  
22 BB posterior positioning.

23

24

25

## 1 RESULTS

2

### 3 Floor-plate polarization shows temporal progression but no spatial 4 synchronization

5 Posterior positioning of the BB in the zebrafish FP is visible as soon as 18 hours  
6 post-fertilization (hpf) (Mahuzier et al., 2012) and is maintained at least until 72 hpf  
7 (Mathewson et al., 2019). From 24 hpf onward, coupled to posterior tilting of cilia, it is  
8 instrumental in propelling the CSF in the spinal cord central canal (Borovina et al.,  
9 2010, Fame et al., 2016). At late gastrulation stages (10 hpf), ectodermal cells  
10 already display a slight posterior bias of centrioles (Sepich et al., 2011). At early  
11 somite (s) stages, centrioles have migrated under the apical membrane in several  
12 cell types and short cilia are detected with the Arl13b-GFP transgenic line (Borovina  
13 et al., 2010).

14 To define the time-course of FP cell polarization during somitogenesis, we assessed  
15 basal-body (BB) position along the antero-posterior (A/P) axis on fixed embryos from  
16 the 6 s to the 26 s stage (Fig. 1a, b). For each cell we defined a BB polarization index  
17 (p.i. in Fig. 1b). BBs already exhibited a posterior bias at 6 s, since 50% of FP cells  
18 had a BB in contact with the apical posterior membrane, and 20% of BBs were  
19 located within the posterior third. The polarization state did not change significantly  
20 until 10 s. While we could find some FP cells with an anterior BB between the 6 s and  
21 14 s stages (Fig. 1a, yellow arrow), it was not the case later. From 10 s onward, there  
22 was a progressive increase in FP polarization, mostly due to an increase in the  
23 percentage of cells with a BB in contact with the posterior membrane, with a  
24 concomitant disappearance of anterior BBs and a reduction of median BBs. The  
25 polarization state of the FP was considered complete at 18 s, since no significant  
26 difference could be detected between the 18 s and 26 s stages. Interestingly, we did  
27 not detect a gradient of polarization index along the A/P axis of the spinal cord (Fig.  
28 S1a), and single non-polarized cells were often intermingled among polarized  
29 neighbors (Fig. S1b), arguing against the existence of waves of polarization  
30 originating from axis extremities.

31

1

## 2 **BBs are highly mobile in FP cells**

3 We then turned to live-imaging to obtain a dynamic view of the polarization process  
4 and assess BB motility within the apical surface and potential correlations with cell  
5 deformation and cell division. We used time-lapse movies to follow BB movements  
6 within the apical surface of individual FP cells at different developmental stages,  
7 ranging from 4 s to 21 s. We found that BBs displayed a highly motile behavior, while  
8 remaining located in the most apical cortex (Fig. 1c-f) (Supplementary movies S1-  
9 S4). They moved both anteriorly and posteriorly (Fig. S1e, first column), and thus not  
10 only toward posterior membranes as could be suggested by the analysis on fixed  
11 samples.

12 BB movements seemed independent of cell deformation. Cell deformations along the  
13 AP axis were more important at early stages (4-10 s) (Fig. 1c, d), probably as a  
14 consequence of convergence-extension movements (compare for example purple  
15 lines of graphs in Fig1d and e), but most BB movements were not correlated with cell  
16 deformation (see Fig. 1c). At later stages (14-21 s) (Fig. 1e, f), cell deformations were  
17 small and did not correlate with BB movements. One possible explanation for the  
18 presence of unpolarized cells next to polarized neighbors is that they could either be  
19 in mitosis or soon after mitosis, before BB re-localization. To test this hypothesis, we  
20 quantified mitoses and followed daughter cells after cell division. Mitoses were rare in  
21 FP cells at early stages (6 mitoses / 79 cells for 9 embryos analyzed at 4-8 s) and  
22 absent at later stages (118 cells from 15 embryos at 13-21s). In addition, after  
23 cytokinesis, the centriole of the posterior daughter cell returned to the posterior  
24 membrane in a very short time (14 min in average, n=6), and so did the centriole of  
25 the anterior daughter cell that polarized during the movie (22 min in average, n=3)  
26 (Fig. S1d) (Supplementary movie S5). Most of the observed unpolarized cells were in  
27 interphase. Thus, we concluded that the state of FP cell polarization was neither  
28 correlated to the cell shape changes nor to the cell cycle.

## 29 **FP polarization involves a change in BB behavior**

30 In order to characterize BB behavioral changes during development, we determined  
31 the percentage of time that BBs spent in contact with the posterior membrane (Fig.

1 1g). At early stages, BBs spent in average 44% of their time in contact with the  
2 posterior membrane, whereas at later stages (13-21 s) it reached 70%. This was  
3 largely due to an increase in the number of cells in which the BB stayed in contact  
4 with the posterior membrane during the whole movie (for example in Fig. 1e). This  
5 situation will be referred to as “posteriorly docked BB”, although it is not known  
6 whether a physical link between BB and the posterior membrane exists. At early  
7 stages (4-8s), we did not observe any cell with posteriorly docked BBs (41 cells  
8 analyzed, 5 embryos), whereas they made up around a third (34%) of the FP cell  
9 population at 13-17s stages (13/38 cells, 6 embryos) and almost half (46%) the FP  
10 population at later stages (17-21s, 27/59 cells, 7 embryos). BB behavioral changes  
11 during somitogenesis were also characterized by a decrease in the frequency of BB  
12 direction changes, as well as an increase in the mean duration of BB/posterior  
13 membrane contact events and mean polarization index, suggesting that, as  
14 development proceeds, BB movements are less dynamic and more confined to the  
15 posterior side of the cell (Fig. S1e, plots of the first line). Posteriorly docked BBs  
16 made a significant contribution to these behavioral changes. In order to determine if  
17 changes in the behavior of non-posteriorly docked BB contributed to the increase of  
18 FP polarization during somitogenesis, we quantified the same parameters, but taking  
19 into account only these motile BBs (Fig. S1e, second line): although less drastic, the  
20 same trend in BB behavior change was observed.

21 To further characterize the behavior of non-posteriorly docked BB, we quantified the  
22 frequency of contact events between the BB and either the anterior or the posterior  
23 membrane (Fig. 1h and i, respectively). First, posterior contacts were more frequent  
24 than anterior ones even at 4-8s (compare Fig. 1h and i), confirming that FP cells  
25 already have a posterior polarization bias at these early stages. Second, contacts  
26 with the anterior membrane were frequently observed at early stages (50% of BBs  
27 make at least one anterior contact per hour, see for example at  $t=70'$  in Fig1d), but  
28 almost never observed at later stages (only 3/57 cells display one anterior contact).  
29 Contact frequency with the posterior membrane was also significantly higher at  
30 earlier stages (1.3 contact/h on average) than at later stages (around 0.8  
31 contacts/hour in average within the 13-21s stage window, Fig. 1i). This reduction in  
32 the number of contact events could be due to an increase in their duration (Fig. S1e,

1 plot 2<sup>nd</sup> column, 2<sup>nd</sup> line) and to a reduction in BB speed. Indeed, we found that BBs  
2 moved faster at earlier stages (FigS1c, median movement speed was around  
3 0.2 $\mu$ m/min at 4-8 s versus 0.1 $\mu$ m/min at 13-21 s). Thus, the observed changes in FP  
4 polarization are explained both by an increase in the posteriorly docked BB  
5 population and by behavioral changes (reduced speed, less direction changes,  
6 longer posterior contact events) in other BBs.

7 Interestingly, live-imaging revealed the presence of membrane invaginations  
8 extending between the BB and transverse membranes (Supplementary movies S6  
9 and S7). At early stages, we could detect such invaginations in 44% of FP cells  
10 (taking into account only non-posteriorly docked BBs) (26 cells out of 59 cells from 9  
11 embryos), most of which were linking the posterior membrane and the BB (78%,  
12 25/32 invagination events, Fig. S2a white arrows) (Movie S6), although invaginations  
13 from the anterior membrane were also seen (Fig. S2b, white arrow) (Movie S7).  
14 These early stage invaginations were most of the time observed on a single time  
15 frame (anterior invaginations) or two consecutive timeframes in time-lapse movies  
16 with a 5 min time interval between two images (FigS2c). Posterior invaginations were  
17 followed by a posterior directed BB movement in 66% of cases (33/50 invaginations),  
18 suggesting a causal link between their formation and movement of the BB to the  
19 posterior membrane. BB behavior following anterior invaginations did not seem  
20 different from BB behavior after posterior invaginations, but these results need to be  
21 confirmed as the number of anterior invaginations was very low (we observed only 14  
22 such events, compared to the 50 posterior invagination events) (FigS2d). Membrane  
23 invaginations were rarely seen at later stages (after 14s, 9/40 cells, 10 embryos),  
24 probably in part because BBs spent a higher fraction of their time associated with the  
25 posterior membrane (see Fig. 1 and Fig. S1).

26 Overall, our dynamic analysis reveals a highly motile behavior of BBs in FP cells at  
27 early somite stages. This was unexpected, given that BBs are already anchored to  
28 the apical membrane at early somite stages and have grown a cilium that protrudes  
29 externally (Fig. 1a) (Borovina et al., 2010). As somitogenesis proceeds, BBs show  
30 decreased mobility. They progressively stop shuttling from anterior to posterior cell  
31 junctions and their contacts with the posterior membrane last longer. Importantly,



1 almost half of them still detach from the posterior membrane but only for short  
2 periods of time and remain close to the posterior apical junction.

3 We therefore made the hypothesis that from the 10s stage, the posterior apical  
4 junctions become progressively enriched in proteins that can mediate BB posterior  
5 localization.

6

### 7 **Posterior enrichment of Par3 precedes BB/posterior membrane contact**

8 In *Drosophila*, the apical junction protein Par3 modulates centrosome positioning in  
9 the male germline and embryonic ectoderm (Inaba et al., 2015, Jiang et al., 2015). In  
10 order to test a potential role for Par3 in BB posterior positioning in FP cells, we first  
11 assessed Par3 localization by immunostaining (Fig. 2a, b). At the 14 s stage, Par3  
12 localized at apical junctions of FP cells (Fig. 2a). Strikingly, Par3 patches were also  
13 detected on transverse membranes (anterior and posterior membranes cannot be  
14 distinguished in this experiment) and in close contact with posteriorly docked BBs  
15 (white arrows, Fig. 2a). This distribution was confirmed using the BazP1085 antibody  
16 (Fig. 2b), which recognizes a conserved Par3 phosphorylation site targeted by Par1  
17 (Krahn et al. 2009). Interestingly, Par3 transversal patches were also present in FP  
18 cells in which the BB was not yet in contact with the posterior membrane (Fig. 2a, b,  
19 right panels) showing that this enrichment precedes stable BB/posterior membrane  
20 contact establishment.

21 In order to test whether Par3 is asymmetrically enriched in FP cells, we used a  
22 mosaic expression approach of Par3-RFP and centrin-GFP fusions in live embryos.  
23 Quantification of Par3 expression showed that, among fully polarized (p.i. =1)  
24 individual Par3-RFP expressing FP cells, both at early (6-12s, Fig. 2c, left) and late  
25 (14-20s, Fig. 2c, right) stages, almost all cells had a Par3-RFP post/ant ratio greater  
26 than 1 (Fig. 2d) (29/30 cells out of 20 embryos; 6-12s, mean ratio= 1.42, N=7, n=9;  
27 14-20s mean ratio =1.38, N=13, n=21). To determine whether the enrichment of Par3  
28 at the posterior membrane preceded BB/posterior membrane contact, we made  
29 movies of BB movements and quantified Par3-RFP posterior/anterior ratio at each  
30 time-point; we found that Par3-RFP was enriched posteriorly before the BB contacts  
31 the posterior membrane (Fig. 2e, f) (12/14 cells from 12 embryos) (Supplementary

1 movies S8 and S9). In contrast, BBs of FP cells with weak or no posterior Par3  
2 enrichment tended to remain unpolarized (either making no contact (2/5 cells, 5  
3 embryos) or unstable contacts (3/5 cells, 5 embryos) with the posterior membrane  
4 (Fig. 2g) (Supplementary movie S10).

5 Thus, we show that Par3 forms patches at FP apical transverse membranes and that  
6 BBs are posteriorly docked at these patches. We further show that Par3 is enriched  
7 posteriorly before BB/posterior membrane contact. Together, our data strongly  
8 suggest that Par3 is a key player in mediating BB positioning at the posterior  
9 membrane, by attracting it and/or holding it when it contacts the posterior membrane.

10

### 11 **At early stages, BBs contact transverse membranes exclusively at Par3** 12 **patches**

13 During the second half of somitogenesis, Par3 tended to form a continuous belt at  
14 apical junctions of FP cells, although it was locally enriched, forming patches that  
15 associated with centrosomes as described above. In contrast, at the 4 to 8 s stages,  
16 Par3 formed small, discrete patches at FP apical transverse membranes, but not at  
17 lateral membranes. These patches were roughly aligned with the AP axis of the  
18 embryo (Fig. 3a, white arrows). Strikingly, BBs made contacts with anterior and  
19 posterior transverse membranes (as described in Fig. 1) exclusively at the level of  
20 these patches (58 cells from 18 embryos) as shown in Fig. 3b and Supplementary  
21 movie S11. In 33% of these cells (19/58), the discrete Par3 patches stretched toward  
22 the BB (for example, Fig. 3b yellow arrows). In about 25% of these stretched patches  
23 (5/19) we could detect an underlying membrane digitation originating from either the  
24 posterior (Fig. 3c, t=0') or the anterior membrane (Fig. 3c, t=64') and extending  
25 toward the BB (Supplementary movie S12). The presence of membrane digitations  
26 and their overlap with Par3 patches point to the existence of mechanical forces  
27 between BBs and membranes at the level of Par3 patches and suggests that Par3  
28 could be required for local force generation.

29

### 30 **Par3 over-expression disrupts BB positioning**

1 To test whether Par3 is required for posterior BB positioning in the FP, we first used a  
2 loss-of-function approach. MO-mediated knock-down of Par3ab (also known as  
3 Pard3 or ASIP) did not disrupt FP PCP (Fig. S3a), nor could we see a defect in a  
4 *MZpar3ab* mutant (Blasky et al., 2014) (Fig. S3c). However, in both cases, Par3  
5 patches could still be detected in the FP by immunostaining (Fig. S3b, d- g),  
6 suggesting that *par3ab* loss-of-function was compensated for by its paralogous  
7 genes (*par3aa*, *par3ba* or *par3bb*), which could also be detected by our Par3  
8 antibodies thanks to the high conservation of the epitopes. We thus turned to an  
9 over-expression approach to disrupt Par3 posterior enrichment and patch formation.  
10 Over-expressed Par3-RFP in the floor-plate localized to apical junctions and did not  
11 disrupt apico-basal polarity, as assessed by the presence of the BB at the apical  
12 surface and the proper localization of the apical junction protein ZO1 (Fig. S3e). In  
13 contrast to MbCherry over-expression taken as a control, Par3-RFP over-expression  
14 disrupted BB posterior positioning in the FP (Fig. 3d, MbCherry median p.i.=1, first  
15 quartile=0.94; Par3-RFP median p.i.=0.8, first quartile=0.64). Furthermore, mosaic  
16 over-expression showed that this effect was cell autonomous, as there was no  
17 significant difference in BB positioning between Par3-RFP negative cells in Par3-RFP  
18 expressing embryos and MbCherry negative cells in MbCherry expressing embryos  
19 (Fig. 3d MbCherry median p.i.=1, first quartile=0.84; Par3-RFP median p.i.=1, first  
20 quartile= 0.83).

21 These results strongly suggest that Par3 posterior enrichment and patch formation  
22 are required for proper BB positioning in the FP.

23

#### 24 **Par3 clustering and localization is disrupted in the *vangl2* mutant FP**

25 Vangl2, a core PCP protein, has been shown to be involved in PCP in the zebrafish  
26 FP (Borovina et al., 2010) but the downstream mechanisms linking Vangl2 to  
27 centrosome posterior positioning are unknown. We thus analyzed the dynamics of FP  
28 polarization in the *vangl2*<sup>m209</sup> (initially called *trf*<sup>m209</sup>) mutant (Solnica-Krezel et al.,  
29 1996). At 18 s, the BB of *vangl2*<sup>m209/m209</sup> FP cells was mispositioned at the center of  
30 the apical cell surface, while *vangl2*<sup>m209/+</sup> embryos had normally polarized BBs as  
31 judged by immunostaining (median p.i.=0.6 versus 1 for wt or *vangl2*<sup>m209/+</sup>) (Fig. 4a,

1 FP polarization plot). Live-imaging of *vangl2*<sup>m209/m209</sup> FP revealed that BBs  
2 maintained a high motility at late stages. In addition, most *vangl2*<sup>m209/m209</sup> BBs made  
3 at least one contact with either transverse or lateral membranes (70%, 17/25),  
4 suggesting that force generators are still present in these mutants but more  
5 dispersed around the cell periphery.

6 To test whether Vangl2 could impact Par3 function in this process, we looked at  
7 phospho-Par3 localization in the *vangl2* mutant. Phospho-Par3 localized at apical  
8 junctions in *vangl2*<sup>m209/m209</sup> as in controls (Fig. 4b). Automatic detection of Par3  
9 patches along the transverse apical junctions revealed that in wt, 90% of FP cells  
10 had at least a major phospho-Par3 patch (Fig. 4b, yellow arrows), with 39% of cells  
11 also having smaller secondary patches (Fig. 4c, N=7, n=186). In *vangl2*<sup>m209/m209</sup>  
12 embryos, the number of FP cells with at least one phospho-Par3 patch was  
13 unchanged (around 90% of cells) but the number of cells with more than one patch  
14 was increased (54% of cells, N=7, n=129). In addition, the prominence of phospho-  
15 Par3 patches fluorescence intensity was decreased in *vangl2*<sup>m209/m209</sup> embryos as  
16 compared to controls (see Fig. 4d for prominence definition and quantification).  
17 Similar results were obtained with the antibody against total Par3, although the  
18 changes in prominence were not statistically significant in this case. Thus, Par3  
19 forms more numerous and smaller patches in *Vangl2* mutants, showing a role for  
20 Vangl2 in Par3 clustering.

21 To analyze BB behavior in *vangl2* mutants and test whether Par3 localization was  
22 affected in *vangl2*<sup>m209/m209</sup> FP cells, we made time-lapse movies of embryos  
23 mosaically injected with Par3-RFP (Fig. 4e, f) (Supplementary movies S13 and S14).  
24 In *vangl2* mutants, FP cells displayed motile BBs that contacted the membrane at the  
25 level of Par3 patches, but the distribution of the patches was very different.  
26 Compared to control embryos (*vangl2*<sup>+/+</sup> and *vangl2*<sup>m209/+</sup>), *vangl2*<sup>m209/m209</sup> embryos at  
27 4-8s displayed more cells with an anterior Par3 patch (82% vs 67%) and less cells  
28 with a posterior patch (65% vs 87%). In addition, lateral Par3 patches were much  
29 more common in *vangl2* mutants (70% vs 20%, *vangl2*<sup>m209/m209</sup>: N=7, n=17; controls :  
30 N=16, n=45, Fig. 4g). These results show that Vangl2 is required for proper  
31 positioning of Par3 patches at early stages. Interestingly, live-imaging of these  
32 embryos also revealed that, despite Par3 mislocalization, BB still made contact with

1 membranes exclusively at Par3 patches (Fig. 4e, f) independently of their position,  
2 whether laterally (Fig. 4e) or posteriorly (Fig. 4f). These observations show that Par3  
3 distribution along apical junctions is disrupted in *vangl2* mutants, leading to a  
4 fragmentation of Par3 patches into more numerous and less intense clusters that  
5 extend to lateral membrane.

## 6 DISCUSSION

7 In this paper we have analyzed the dynamics of BB posterior positioning in the  
8 embryonic zebrafish FP. We show that, quite unexpectedly, BBs are highly mobile  
9 and are able to contact, and bounce off, apical junctions several times per hour. FP  
10 polarization correlates with slowing down of BBs. At the level of individual cells, BBs  
11 settle down posteriorly at the level of junctions enriched in Par3, and we show that  
12 Par3 is important for BB posterior localization. In the PCP mutant *Vangl2*, BBs show  
13 poorly oriented movements and this correlates with Par3 mislocalization. We discuss  
14 here the implications of our dynamic study on the understanding of the mechanisms  
15 of cilium polarization downstream of the PCP pathway. Our data highlight Par3 as a  
16 critical player in centriole positioning in this system.

17 Analysis of fixed samples showed that posterior positioning of BBs within the apical  
18 surface of FP cells progressed regularly within the 8 hour-time frame of our study and  
19 was complete at the 18 s stage. Surprisingly, live imaging revealed that, during this  
20 time frame, BBs underwent active antero-posterior movements under the apical  
21 surface, in both directions. This contrasts with the situation in the mouse cochlea,  
22 where live-imaging of explants had suggested very slow and regular movements of  
23 the BBs to the lateral cortex of inner hair cells (estimated speed of 10-50 nm/h,  
24 undetectable in movies) (Lepelletier et al., 2013). The BB speed measured in our  
25 experiments (median speed of 0.2  $\mu\text{m}/\text{min}$  at early stages of polarization) is closer to  
26 that of the second phase of centrosome migration toward the immune-synapse in T  
27 cells, when the centrosome approaches the actin rich cortex that faces the target cell  
28 (1  $\mu\text{m}/\text{min}$ ) (Yi et al., 2013). This suggests that BB movements in FP cells could rely  
29 on mechanisms similar to those found in T lymphocytes, where end-on capture-  
30 shrinkage of microtubules by dynein at the immune synapse pulls the centrosome. A  
31 striking difference between these two processes is the presence of a growing cilium

1 anchored to the distal part of the BB in FP cells. Thus, it is likely that the presence of  
2 a cilium does not have a major impact on BB movement.

3 The lack of synchronization between adjacent cells and of long-range temporal  
4 gradient of BB polarization suggests that the timing of polarization is largely  
5 dependent on cell-intrinsic cues. Cell division did not appear to have a major role in  
6 the timing of polarization. Thus, we proposed the maturation of cell junctions as a  
7 possible trigger of polarization. Accordingly, we found that Par3 accumulated in  
8 patches at the posterior apical junctions of FP cells and that this accumulation  
9 preceded BB posterior docking. Interestingly, several recent studies suggest that  
10 Par3 could have a widely conserved role in PCP: Par3 is asymmetrically localized  
11 within the plane of the epithelium in *Drosophila* ommatidia (Aigouy et al., 2016), in  
12 *Xenopus* embryo ectoderm (Chuykin et al., 2019) and in the mouse cochlea (Landin  
13 Malt et al., 2019). Beside their asymmetric enrichment in polarized tissues, Par3  
14 clusters may be broadly involved in BB/centrioles recruitment. Indeed, In the mouse  
15 cochlea, Par3 transiently localizes to the abneural membrane of hair cells and is  
16 required for proper BB localization (Landin Malt et al., 2019). Moreover, in *Drosophila*  
17 early gastrula ectoderm, Par3 isotropic distribution around apical junctions  
18 contributes to epithelium integrity, but in aPKC loss of function mutants, Par3  
19 accumulates as discrete patches that align along the dorso-ventral axis and recruit  
20 centrosomes (Jiang et al., 2015). Centrosome docking at discrete Par3 patches has  
21 also been observed in *Drosophila* germ stem cells and is critical for proper division  
22 orientation (Inaba et al., 2015).

23 Our analysis of the *vangl2* mutant defective in FP polarity brings important insight  
24 into the role of Par3 in FP polarization. In *vangl2*<sup>m209/m209</sup> embryos, BBs showed less  
25 oriented movements than in wt embryos. In contrast to the wt situation, BBs  
26 contacted both transverse and lateral membranes. Strikingly, in *vangl2* mutants as in  
27 wt, BBs always contacted the apical junctions at the level of Par3-positive patches.  
28 The altered behavior of BBs in *vangl2*<sup>m209/m209</sup> embryos correlated with a  
29 mislocalization of Par3 around the apical junctions of FP cells. Since Par3  
30 overexpression affected BB polarization, we propose that Par3 posterior enrichment  
31 under the control of the PCP pathway is a main actor in BB posterior positioning.

1 How PCP proteins act on Par3 localization in the FP remains to be uncovered. In FP  
2 cells, Vangl2 localizes anteriorly (Davey et al. 2016), suggesting that its effect on  
3 Par3 localization is indirect. Vangl2 effect on Par3 could be mediated by Dvl, since it  
4 is required for proper asymmetric localization of Dvl in planar polarized tissues and  
5 Dvl, together with Meru, can recruit Par3 to sensory organ precursor posterior  
6 membrane in *Drosophila* (Banerjee et al. 2017). Dvl could also recruit Par3 via Daple,  
7 as this protein colocalizes with Par3 in the mouse cochlea and can bind both Dvl and  
8 Par3 in yeast two-hybrid assays (Siletti et al. 2017).

9 The mechanisms by which Par3 can recruit the BB at the plasma membrane are  
10 unknown. Par3 enrichment could attract the BB to the posterior membrane or,  
11 alternatively, could capture or hold it when it contacts the posterior membrane. The  
12 observation of membrane invaginations suggests the existence of mechanical forces  
13 between Par3-positive patches and BBs. Such membrane invaginations have been  
14 previously observed during cell division in the *C. elegans* zygote (Redemann et al.,  
15 2010) and in the *C. intestinalis* embryo epidermal lineage (Negishi et al., 2016), as  
16 well as at the immunological synapse in T cells (Yi et al., 2013). In all three cases,  
17 the existence of attraction forces between the centriole and the membrane has been  
18 proposed.

19 Microtubules were recently shown to be instrumental in FP polarity maintenance at  
20 late stages (30 to 72 hours post fertilization, Mathewson et al. 2019) and our results  
21 suggest that they could also be involved in polarity establishment. Indeed, BB  
22 movement toward the posterior Par3 patches could involve local microtubule  
23 dynamics regulation, since Par3 can interact with Dynein (Schmoranzler et al., 2009)  
24 and also with microtubules, directly (Chen et al., 2013) or indirectly via 14-3-3  
25 proteins (Benton et al., 2003). Interestingly, we found that a form of Par3  
26 phosphorylated at two conserved serine residues is enriched at posterior junctions.  
27 This phosphorylation site is a target of the Par1 kinase. It plays a role in centrosome  
28 recruitment at Par3 patches in *Drosophila* (Jiang et al., 2015) and in the interaction of  
29 Par3 with 14-3-3 proteins and thus with microtubules in other systems (Benton et al.,  
30 2003).

1 Par3 could also act indirectly on microbutules via Rac1, which mediates Par3  
2 function in the mouse cochlea (Landin Malt et al., 2019). In different systems, Par3  
3 regulates the local activity of Rac via the RacGEFs Tiam1 and Trio (Nishimura et al.,  
4 2005, Matsuzawa et al., 2016). Par3 can increase microtubule catastrophe rate by  
5 inhibiting Trio in neural crest cells (Moore et al., 2013), and Rac1 can regulate  
6 microtubule dynamics via CLIP-170 or Stathmin in other systems (Fukata et al.,  
7 2002, Wittmann et al., 2004).

8 Asymmetric centriole positioning is now recognized as a conserved readout of PCP  
9 (Carvajal-Gonzalez 2016). It will be interesting to investigate whether Par3 has a  
10 conserved role in centriole/BB positioning in metazoans.

11

12



## 1 MATERIALS AND METHODS

### 2 *Experimental model and subject details*

3 Wild-type and mutant zebrafish embryos were obtained by natural spawning. To  
4 obtain the early stages (4-8s), embryos were collected at 10 am and incubated for 9  
5 h in a 33°C incubator. To obtain later stages (14-20s), embryos were collected at 10  
6 am and incubated for 2 h at 28 °C before being placed overnight in a 24 °C incubator.  
7 All our experiments were made in agreement with the european Directive 210/63/EU  
8 on the protection of animals used for scientific purposes, and the french application  
9 decree 'Décret 2013-118'. The projects of our group have been approved by our local  
10 ethical committee 'Comité d'éthique Charles Darwin'. The authorisation number is  
11 2015051912122771 v7 (APAFIS#957). The fish facility has been approved by the  
12 French 'Service for animal protection and health' with approval number A-75-05-25.

13

### 14 *Method details*

#### 15 mRNA and morpholino injection

16 mRNAs were synthesized from linearized pCS2 vectors using the mMACHINE  
17 mMACHINE SP6 transcription kit (Ambion). The following amounts of mRNA were  
18 injected into one-cell stage embryos: 22pg for Centrin-GFP, 40 pg for mbCherry  
19 (membrane Cherry) or Membrane-GFP (Gap43-GFP). For Par3-RFP mosaic  
20 expression, mRNAs were injected at the 16 cell stage in a single blastomere, using  
21 50pg for Par3-RFP live-imaging or 150pg Par3-RFP for over-expression experiments  
22 (the concentrations for Centrin-GFP and membrane-GFP mRNAs were the same as  
23 for one-cell stage injections). Par3-MO was injected at a concentration of 0.3mM at  
24 one-cell stage.

25

#### 26 Immunostaining

27 For immunostaining, embryos were fixed in Dent fixative (80% Methanol, 20%  
28 DMSO) at 25°C for 2h, blocked in 5% goat serum, 1% bovine serum albumin and  
29 0.3% triton in PBS for 1 h at room temperature and incubated overnight at 4 °C with  
30 primary antibodies and 2h at room temperature with secondary antibodies. The yolk

1 was then removed and the embryo mounted in Vectashield medium on a slide.  
2 Imaging was done using a Leica TCS SP5 AOBS upright confocal microscope using  
3 a 63X oil lens.

4

#### 5 **Live imaging.**

6 Embryos were dechorionated manually and mounted in 0.5% low-melting agarose in  
7 E3 medium. Movies were recorded at the temperature of the imaging facility room (22  
8 °C) on a Leica TCS SP5 AOBS upright confocal microscope using a 63X (NA 0.9)  
9 water immersion lens.

10

#### 11 **Quantification and statistical analysis**

12 All bar-plots, boxplot and violin plots and statistical tests were generated with R and  
13 Rstudio.

14

#### 15 **Basal-bodies movements**

16 Distance between BB and posterior membrane in FP was measured manually at  
17 each time-frame in FIJI. The results were then plotted using python matplotlib and  
18 analyzed with a custom python script to extract relevant information such as the  
19 frequency of contact with posterior membrane or percentage of total time spent in  
20 contact with posterior membrane.

21

#### 22 **Par3-RFP posterior/anterior ratio**

23 Fluorescence intensity was measured along the anterior-posterior length of isolated  
24 labelled FP cells in FIJI. A custom python script was then used to extract the first  
25 quarter (cell anterior side) and last quarter (cell posterior side) of fluorescence  
26 intensity values, to determine the area under each curve (corresponding to  
27 fluorescence intensity), calculate the post/ant ratio and plot it along with the  
28 polarization index (see BB movements analysis section).

29

## 1 Par3 peaks quantification

2 Fluorescence intensity from immunostained embryos was measured along FP cells  
 3 transverse membranes and exported to Matlab where the findpeaks function was  
 4 used to detect Par3 peaks and measure their prominence.

5

## 6 REAGENTS AND RESOURCES

| Reagent type or resource | Designation                                                    | Source or reference | Identifiers                    | Additional information |
|--------------------------|----------------------------------------------------------------|---------------------|--------------------------------|------------------------|
| Antibody                 | Mouse monoclonal IgG2a anti-centrin (clone 20H5)               | Merck Millipore     | # 04-1624<br>RRID: AB_10563501 | 1:200 dilution         |
| Antibody                 | Mouse monoclonal IgG1 anti-ZO1 (clone ZO1-1A12)                | Invitrogen          | RRID: AB_2533147               | 1:400 dilution         |
| Antibody                 | Mouse monoclonal IgG2b anti-acetylated-tubulin (clone 6-11B-1) | Sigma-Aldrich       | #T 6793 RRID: AB_477585        | 1:400 dilution         |
| Antibody                 | Rabbit polyclonal anti-Par3                                    | Merck Millipore     | #07-330<br>RRID:AB_11213581    | 1:200 dilution         |
| Antibody                 | Rabbit polyclonal anti-phosphorylated-Ser1085-Bazooka          | Krahn et al. 2009   | N/A                            | 1:200 dilution         |
| Antibody                 | Rabbit polyclonal anti-DsRed                                   | Takara              | # 632496<br>RRID:AB_10013483   | 1:400 dilution         |
| Antibody                 | Goat anti-mouse IgG1 Alexa633                                  | Molecular probes    | # A-21126<br>RRID:AB_2535768   | 1:400 dilution         |
| Antibody                 | Goat anti-mouse IgG2a Alexa568                                 | Molecular probes    | # A-21134<br>RRID:AB_2535773   | 1:400 dilution         |
| Antibody                 | Goat anti-mouse IgG2a Alexa488                                 | Molecular probes    | # A-21131<br>RRID:AB_141618    | 1:400 dilution         |
| Antibody                 | Goat anti-mouse IgG2b Alexa633                                 | Molecular probes    | # A-21146<br>RRID:AB_2535782   | 1:400 dilution         |
| Antibody                 | Goat anti-rabbit IgG Alexa568                                  | Molecular probes    | # A-11011<br>RRID:AB_143157    | 1:400 dilution         |
| Chemical                 | Methanol                                                       | VWR Chemicals       | 20847.295                      |                        |
| Chemical                 | DMSO                                                           | Sigma               | D2650                          |                        |
| Chemical                 | Goat serum                                                     | Sigma               | G6767                          |                        |

|                      |                                                    |                                            |                                                                                                                           |  |
|----------------------|----------------------------------------------------|--------------------------------------------|---------------------------------------------------------------------------------------------------------------------------|--|
| Chemical             | Bovine serum albumin                               | Sigma                                      | A2153                                                                                                                     |  |
| Chemical             | Triton X100                                        | Sigma                                      | T8787                                                                                                                     |  |
| Chemical             | Vectashield                                        | Vector Laboratories                        | H-1000                                                                                                                    |  |
| Strain (Danio rerio) | zebrafish wild-type AB or (TL x AB) hybrid strains | N/A                                        | N/A                                                                                                                       |  |
| Strain (Danio rerio) | Zebrafish Vangm209 mutants                         | Solnica-Krezel et al., 1996                | ZDB-GENO-190204-5                                                                                                         |  |
| Strain (Danio rerio) | Zebrafish Par3ab fh305 mutants                     | Blasky et al., 2014                        | ZDB-FISH-150901-20689                                                                                                     |  |
| Oligonucleotide      | Par3-MO<br>tcaaaggctcccgtgctctggtgc                | Wei et al., 2004                           |                                                                                                                           |  |
| Recombinant DNA      | pCS2-Membrane-Cherry                               | Megason et al. 2009                        | N/A                                                                                                                       |  |
| Recombinant DNA      | pCS2-GFPHumcentrin1                                | Pouthas et al. 2008                        | N/A                                                                                                                       |  |
| Recombinant DNA      | pCS2+-Par3-RFP                                     | Paula Alexandre, unpublished               | N/A                                                                                                                       |  |
| Recombinant DNA      | pCS-Gap43-GFP                                      | David Wilkinson, unpublished               | N/A                                                                                                                       |  |
| Software             | Fiji/ImageJ                                        | ImageJ                                     | <a href="https://imagej.net/Fiji/Downloads">https://imagej.net/Fiji/Downloads</a>                                         |  |
| Software             | MATLAB R2018a                                      | Mathworks                                  | <a href="https://www.mathworks.com/downloads/">https://www.mathworks.com/downloads/</a>                                   |  |
| Software             | Python 2.7.13                                      | Python Software Foundation                 | <a href="https://www.python.org/downloads/release/python-2713/">https://www.python.org/downloads/release/python-2713/</a> |  |
| Software             | R studio Version 1.1.463                           | Rstudio                                    | <a href="https://www.rstudio.com/">https://www.rstudio.com/</a>                                                           |  |
| Software             | R version 3.3.2                                    | The R Foundation for Statistical Computing | <a href="https://cran.r-project.org/bin/macosx/">https://cran.r-project.org/bin/macosx/</a>                               |  |

1

2

3

## 1 BIBLIOGRAPHY

2  
3  
4 Aigouy B, Le Bivic A. The PCP pathway regulates Baz planar distribution in epithelial  
5 cells. *Sci Rep*. 2016 Sep 14;6:33420. doi: 10.1038/srep33420.

6  
7 Banerjee JJ, Aerne BL, Holder MV, Hauri S, Gstaiger M, Tapon N. Meru couples  
8 planar cell polarity with apical-basal polarity during asymmetric cell division. *eLife*  
9 *Sciences* 6, e25014 (2017). doi: 10.7554/eLife.25014

10  
11 Benton R, St Johnston D. Drosophila PAR-1 and 14-3-3 inhibit Bazooka/PAR-3 to  
12 establish complementary cortical domains in polarized cells. *Cell*. 2003 Dec  
13 12;115(6):691-704.

14  
15 Blasky AJ, Pan L, Moens CB, Appel B. Pard3 regulates contact between neural crest  
16 cells and the timing of Schwann cell differentiation but is not essential for neural crest  
17 migration or myelination. *Dev Dyn*. 2014 Dec;243(12):1511-23. doi:  
18 10.1002/dvdy.24172.

19  
20 Borovina A, Superina S, Voskas D, Ciruna B. Vangl2 directs the posterior tilting and  
21 asymmetric localization of motile primary cilia. *Nat Cell Biol*. 2010 Apr;12(4):407-12.  
22 doi: 10.1038/ncb2042.

23  
24 Boutin C, Goffinet AM, Tissir F. Celsr1-3 cadherins in PCP and brain development.  
25 *Curr Top Dev Biol*. 2012;101:161-83. doi: 10.1016/B978-0-12-394592-1.00010-7.

26  
27 Carvajal-Gonzalez JM, Mulero-Navarro S, Mlodzik M. Centriole positioning in  
28 epithelial cells and its intimate relationship with planar cell polarity. *Bioessays*. 2016  
29 Dec;38(12):1234-1245. doi: 10.1002/bies.201600154.

30  
31 Chen S, Chen J, Shi H, Wei M, Castaneda-Castellanos DR, Bultje RS, Pei X,  
32 Kriegstein AR, Zhang M, Shi SH. Regulation of microtubule stability and organization  
33 by mammalian Par3 in specifying neuronal polarity. *Dev Cell*. 2013 Jan 14;24(1):26-  
34 40. doi: 10.1016/j.devcel.2012.11.014.

35  
36 Chuykin I, Ossipova O, Sokol SY. Par3 interacts with Prickle3 to generate apical PCP  
37 complexes in the vertebrate neural plate. *Elife*. 2018 Sep 26;7. pii: e37881. doi:  
38 10.7554/eLife.37881.

39  
40 Davey, C. F., Mathewson, A. W. & Moens, C. B. PCP Signaling between Migrating  
41 Neurons and their Planar-Polarized Neuroepithelial Environment Controls Filopodial  
42 Dynamics and Directional Migration. *PLOS Genetics* 12, e1005934 (2016).

43  
44 Ezan J, Lasvaux L, Gezer A, Novakovic A, May-Simera H, Belotti E, Lhoumeau AC,  
45 Birnbaumer L, Beer-Hammer S, Borg JP, Le Bivic A, Nürnberg B, Sans N,  
46 Montcouquiol M. Primary cilium migration depends on G-protein signalling control of  
47 subapical cytoskeleton. *Nat Cell Biol*. 2013 Sep;15(9):1107-15. doi:  
48 10.1038/ncb2819.

- 1  
2 Fame RM, Chang JT, Hong A, Aponte-Santiago NA, Sive H. Directional  
3 cerebrospinal fluid movement between brain ventricles in larval zebrafish. *Fluids*  
4 *Barriers CNS*. 2016 Jun 21;13(1):11. doi: 10.1186/s12987-016-0036-z.  
5  
6 Fukata M, Watanabe T, Noritake J, Nakagawa M, Yamaga M, Kuroda S, Matsuura Y,  
7 Iwamatsu A, Perez F, Kaibuchi K. Rac1 and Cdc42 capture microtubules through  
8 IQGAP1 and CLIP-170. *Cell*. 2002 Jun 28;109(7):873-85.  
9  
10 Grimsley-Myers CM, Sipe CW, Géléoc GS, Lu X. The small GTPase Rac1 regulates  
11 auditory hair cell morphogenesis. *J Neurosci*. 2009 Dec 16;29(50):15859-69. doi:  
12 10.1523/JNEUROSCI.3998-09.2009.  
13  
14 Guirao B, Meunier A, Mortaud S, Aguilar A, Corsi JM, Strehl L, Hirota Y, Desoeuvre  
15 A, Boutin C, Han YG, Mirzadeh Z, Cremer H, Montcouquiol M, Sawamoto K, Spassky  
16 N. Coupling between hydrodynamic forces and planar cell polarity orients mammalian  
17 motile cilia. *Nat Cell Biol*. 2010 Apr;12(4):341-50. doi: 10.1038/ncb2040.  
18  
19 Hashimoto M, Shinohara K, Wang J, Ikeuchi S, Yoshida S, Meno C, Nonaka S,  
20 Takada S, Hatta K, Wynshaw-Boris A, Hamada H. Planar polarization of node cells  
21 determines the rotational axis of node cilia. *Nat Cell Biol*. 2010 Feb;12(2):170-6. doi:  
22 10.1038/ncb2020.  
23  
24 Hegan PS, Ostertag E, Geurts AM, Mooseker MS. Myosin Id is required for planar  
25 cell polarity in ciliated tracheal and ependymal epithelial cells. *Cytoskeleton*  
26 (Hoboken). 2015 Oct;72(10):503-16. doi: 10.1002/cm.21259.  
27  
28 Hirota Y, Meunier A, Huang S, Shimosawa T, Yamada O, Kida YS, Inoue M, Ito T,  
29 Kato H, Sakaguchi M, Sunabori T, Nakaya MA, Nonaka S, Ogura T, Higuchi H,  
30 Okano H, Spassky N, Sawamoto K. Planar polarity of multiciliated ependymal cells  
31 involves the anterior migration of basal bodies regulated by non-muscle myosin II.  
32 *Development*. 2010 Sep;137(18):3037-46. doi: 10.1242/dev.050120.  
33  
34 Inaba M, Venkei ZG, Yamashita YM. The polarity protein Baz forms a platform for the  
35 centrosome orientation during asymmetric stem cell division in the *Drosophila* male  
36 germline. *Elife*. 2015 Mar 20;4. doi: 10.7554/eLife.04960.  
37  
38 Jiang T, McKinley RF, McGill MA, Angers S, Harris TJ. A Par-1-Par-3-Centrosome  
39 Cell Polarity Pathway and Its Tuning for Isotropic Cell Adhesion. *Curr Biol*. 2015 Oct  
40 19;25(20):2701-8. doi: 10.1016/j.cub.2015.08.063. Epub 2015 Oct 8.  
41  
42 Jones C, Roper VC, Foucher I, Qian D, Banizs B, Petit C, Yoder BK, Chen P. Ciliary  
43 proteins link basal body polarization to planar cell polarity regulation. *Nat Genet*.  
44 2008 Jan;40(1):69-77.  
45  
46 Landin Malt A, Dailey Z, Holbrook-Rasmussen J, Zheng Y, Hogan A, Du Q, Lu X.  
47 Par3 is essential for the establishment of planar cell polarity of inner ear hair cells.

- 1 Proc Natl Acad Sci U S A. 2019 Mar 12;116(11):4999-5008. doi:  
2 10.1073/pnas.1816333116.  
3
- 4 Lepelletier L, de Monvel JB, Buisson J, Desdouets C, Petit C. Auditory hair cell  
5 centrioles undergo confined Brownian motion throughout the developmental  
6 migration of the kinocilium. *Biophys J*. 2013 Jul 2;105(1):48-58. doi:  
7 10.1016/j.bpj.2013.05.009.  
8
- 9 Mahuzier A1, Gaudé HM, Grampa V, Anselme I, Silbermann F, Leroux-Berger M,  
10 Delacour D, Ezan J, Montcouquiol M, Saunier S, Schneider-Maunoury S, Vesque C.  
11 Dishevelled stabilization by the ciliopathy protein Rpgrip1l is essential for planar cell  
12 polarity. *J Cell Biol*. 2012 Sep 3;198(5):927-40. doi: 10.1083/jcb.201111009.  
13
- 14 Mathewson AW, Berman DG, Moens CB. Microtubules are required for the  
15 maintenance of planar cell polarity in monociliated floorplate cells. *Dev Biol*. 2019 Apr  
16 25. pii: S0012-1606(18)30742-5. doi: 10.1016/j.ydbio.2019.04.007.  
17
- 18 Matsuzawa K, Akita H, Watanabe T, Kakeno M, Matsui T, Wang S, Kaibuchi K.  
19 PAR3-aPKC regulates Tiam1 by modulating suppressive internal interactions. *Mol*  
20 *Biol Cell*. 2016 May 1;27(9):1511-23. doi: 10.1091/mbc.E15-09-0670.  
21
- 22 Megason SG. In toto imaging of embryogenesis with confocal time-lapse microscopy.  
23 *Methods Mol Biol*. 2009;546:317-32. doi: 10.1007/978-1-60327-977-2\_19.  
24
- 25 Meunier A, Azimzadeh J. Multiciliated Cells in Animals. *Cold Spring Harb Perspect*  
26 *Biol*. 2016 Dec 1;8(12). pii: a028233. doi: 10.1101/cshperspect.a028233.  
27
- 28 Mirzadeh Z, Han YG, Soriano-Navarro M, García-Verdugo JM, Alvarez-Buylla A.  
29 Cilia organize ependymal planar polarity. *J Neurosci*. 2010 Feb 17;30(7):2600-10.  
30 doi: 10.1523/JNEUROSCI.3744-09.2010.  
31
- 32 Mitchell B, Stubbs JL, Huisman F, Taborek P, Yu C, Kintner C. The PCP pathway  
33 instructs the planar orientation of ciliated cells in the *Xenopus* larval skin. *Curr Biol*.  
34 2009 Jun 9;19(11):924-9. doi: 10.1016/j.cub.2009.04.018.  
35
- 36 Montcouquiol M, Rachel RA, Lanford PJ, Copeland NG, Jenkins NA, Kelley MW.  
37 Identification of Vangl2 and Scrb1 as planar polarity genes in mammals. *Nature*.  
38 2003 May 8;423(6936):173-7.  
39
- 40 Moore R, Theveneau E, Pozzi S, Alexandre P, Richardson J, Merks A, Parsons M,  
41 Kashaf J, Linker C, Mayor R. Par3 controls neural crest migration by promoting  
42 microtubule catastrophe during contact inhibition of locomotion. *Development*. 2013  
43 Dec;140(23):4763-75. doi: 10.1242/dev.098509.  
44
- 45 Negishi T, Miyazaki N, Murata K, Yasuo H, Ueno N. Physical association between a  
46 novel plasma-membrane structure and centrosome orients cell division. *Elife*. 2016  
47 Aug 9;5. pii: e16550. doi: 10.7554/eLife.16550.  
48

- 1 Nishimura T, Yamaguchi T, Kato K, Yoshizawa M, Nabeshima Y, Ohno S, Hoshino  
2 M, Kaibuchi K. AR-6-PAR-3 mediates Cdc42-induced Rac activation through the Rac  
3 GEFs STEF/Tiam1. *Nat Cell Biol.* 2005 Mar;7(3):270-7.  
4
- 5 Ohata S, Herranz-Pérez V, Nakatani J, Boletta A, García-Verdugo JM, Álvarez-Buylla  
6 A. Mechanosensory Genes Pkd1 and Pkd2 Contribute to the Planar Polarization of  
7 Brain Ventricular Epithelium. *J Neurosci.* 2015 Aug 5;35(31):11153-68. doi:  
8 10.1523/JNEUROSCI.0686-15.2015.  
9
- 10 Pouthas F, Girard P, Lecaudey V, Ly TB, Gilmour D, Boulin C, Pepperkok R,  
11 Reynaud EG. In migrating cells, the Golgi complex and the position of the  
12 centrosome depend on geometrical constraints of the substratum. *J Cell Sci.* 2008  
13 Jul 15;121(Pt 14):2406-14. doi: 10.1242/jcs.026849.  
14
- 15 Redemann S, Pecreaux J, Goehring NW, Khairy K, Stelzer EH, Hyman AA, Howard  
16 J. Membrane invaginations reveal cortical sites that pull on mitotic spindles in one-  
17 cell *C. elegans* embryos. *PLoS One.* 2010 Aug 20;5(8):e12301. doi:  
18 10.1371/journal.pone.0012301.  
19
- 20 Ross AJ, May-Simera H, Eichers ER, Kai M, Hill J, Jagger DJ, Leitch CC, Chapple  
21 JP, Munro PM, Fisher S, Tan PL, Phillips HM, Leroux MR, Henderson DJ, Murdoch  
22 JN, Copp AJ, Eliot MM, Lupski JR, Kemp DT, Dollfus H, Tada M, Katsanis N, Forge  
23 A, Beales PL. Disruption of Bardet-Biedl syndrome ciliary proteins perturbs planar  
24 cell polarity in vertebrates. *Nat Genet.* 2005 Oct;37(10):1135-40.  
25
- 26 Schmoranzner J, Fawcett JP, Segura M, Tan S, Vallee RB, Pawson T, Gundersen  
27 GG.  
28 Par3 and dynein associate to regulate local microtubule dynamics and centrosome  
29 orientation during migration. *Curr Biol.* 2009 Jul 14;19(13):1065-74. doi:  
30 10.1016/j.cub.2009.05.065.  
31
- 32 Sepich DS, Usmani M, Pawlicki S, Solnica-Krezel L. Wnt/PCP signaling controls  
33 intracellular position of MTOCs during gastrulation convergence and extension  
34 movements. *Development.* 2011 Feb;138(3):543-52. doi: 10.1242/dev.053959.  
35
- 36 Siletti, K., Tarchini, B. & Hudspeth, A. J. Daple coordinates organ-wide and cell-  
37 intrinsic polarity to pattern inner-ear hair bundles. *Proceedings of the National*  
38 *Academy of Sciences* 201716522 (2017). doi:10.1073/pnas.1716522115  
39
- 40 Solnica-Krezel L1, Stemple DL, Mountcastle-Shah E, Rangini Z, Neuhaus SC,  
41 Malicki J, Schier AF, Stainier DY, Zwartkruis F, Abdelilah S, Driever W. Mutations  
42 affecting cell fates and cellular rearrangements during gastrulation in zebrafish.  
43 *Development.* 1996 Dec;123:67-80.  
44
- 45 Song H, Hu J, Chen W, Elliott G, Andre P, Gao B, Yang Y. Planar cell polarity breaks  
46 bilateral symmetry by controlling ciliary positioning. *Nature.* 2010 Jul  
47 15;466(7304):378-82. doi: 10.1038/nature09129.  
48



- 1 Tarchini B, Jolicoeur C, Cayouette M. A molecular blueprint at the apical surface  
2 establishes planar asymmetry in cochlear hair cells. *Dev Cell*. 2013 Oct 14;27(1):88-  
3 102. doi: 10.1016/j.devcel.2013.09.011.  
4
- 5 Wallingford JB. Planar cell polarity signaling, cilia and polarized ciliary beating. *Curr*  
6 *Opin Cell Biol*. 2010 Oct;22(5):597-604. doi: 10.1016/j.ceb.2010.07.011.  
7
- 8 Wei X, Cheng Y, Luo Y, Shi X, Nelson S, Hyde DR. The zebrafish *Pard3* ortholog is  
9 required for separation of the eye fields and retinal lamination. *Dev Biol*. 2004 May  
10 1;269(1):286-301.  
11
- 12 Wittmann T, Bokoch GM, Waterman-Storer CM. Regulation of microtubule  
13 destabilizing activity of Op18/stathmin downstream of Rac1. *J Biol Chem*. 2004 Feb  
14 13;279(7):6196-203.  
15
- 16 Krahn MP, Egger-Adam D, Wodarz A. PP2A antagonizes phosphorylation of  
17 Bazooka by PAR-1 to control apical-basal polarity in dividing embryonic neuroblasts.  
18 *Dev Cell*. 2009 Jun;16(6):901-8. doi: 10.1016/j.devcel.2009.04.011.  
19
- 20 Yi J, Wu X, Chung AH, Chen JK, Kapoor TM, Hammer JA. Centrosome repositioning  
21 in T cells is biphasic and driven by microtubule end-on capture-shrinkage. *J Cell Biol*.  
22 2013 Sep 2;202(5):779-92. doi: 10.1083/jcb.201301004.  
23

1 **ACKNOWLEDGEMENTS**

2  
3

4 We are grateful to the aquatic animal and cell imaging facilities of the IBPS (Institut  
5 de Biologie Paris-Seine FR3631, Sorbonne Université, CNRS, Paris, France) for their  
6 technical assistance. We thank Teresa Ferraro for sharing her expertise in image  
7 analysis, Marie Breau for her help in setting up the live imaging protocol, Isabelle  
8 Anselme for participation in genotyping. We thank Paula Alexandre for the kind gift of  
9 Par3-RFP construct, Andreas Wodarz for the BazP1085 antibody, Maximilien  
10 Furthauer for the *vangl2<sup>m209</sup>* line. We thank Nicolas David and Marie Breau for critical  
11 reading and insightful comments on the manuscript. This work was supported by  
12 funding from the Agence Nationale pour la Recherche (ANR, project  
13 CILIAINTHEBRAIN to SSM) and the Fondation pour la Recherche Médicale (Equipe  
14 FRM DEQ20140329544 funding to SSM). A.D was supported by fellowships from the  
15 Ecole Normale Supérieure de Cachan and from the Fondation ARC contre le Cancer.  
16 The authors declare no competing financial interests.

17  
18  
19

## 1 **FIGURE LEGENDS**

2

### 3 **Figure 1 Floor-plate planar polarization involves a change in basal body** 4 **(BB) motile behavior.**

5 **a, b)** Time-course of floor-plate polarization between the 6 s and 26 s stages **a)**  
6 Dorsal views of the floor-plate of flat-mounted embryos showing immunostaining  
7 against Centrin (green, BB), ZO1 (magenta, apical junctions) and Acetylated-Tubulin  
8 (white, cilia) at 12 s (up) and 26 s (down). Note that cilia are already visible at 12 s  
9 but are much longer at 26 s. The yellow arrow points at an anterior BB associated to  
10 a cilium. **b)** Quantification of BB position measured from immuno-stained samples as  
11 shown in a. BB position along the anterior-posterior axis was quantified using the  
12 polarization index (defined as  $p.i.=1-(a/b)$  where “a” is the distance between the BB  
13 and the posterior membrane and “b” the distance between anterior and posterior  
14 membranes, cf scheme in b lower right). Cells were then allocated to different  
15 categories depending on their polarization index for each developmental stage (6 s:  
16 7 embryos, 108 cells ; 8 s: 14 embryos, 224 cells ; 10 s: 14 embryos, 354 cells ; 12 s:  
17 5 embryos, 156 cells ; 14 s: 9 embryos, 208 cells ; 16 s: 9 embryos, 220 cells ; 18 s:  
18 5 embryos, 143 cells ; 26 s: 4 embryos, 119 cells). **c-f)** Live imaging of BB  
19 movements during the polarization process. Images were taken every 5 minutes; a  
20 selection of images is presented here from two early stage embryos (**c, d** movies  
21 between the 6 s and 9 s stages; **d** yellow arrow points at an anterior contact event)  
22 and two late stage embryos (**e, f** movies between the 18 s and 21 s stages). The  
23 distances between BBs and posterior membranes were then plotted (green curve, “a”  
24 in the scheme in Fig1b) along with the distance between the anterior and posterior  
25 membranes (magenta curve, “b” in the scheme in Fig1b) and the p.i. (dashed blue  
26 curve). Black arrows on the graphs indicate the position of the images displayed on  
27 the left. **g)** Quantification of the percentage of total movie time spent by the BB in  
28 contact with the posterior membrane. (4-8s: 5 embryos, 41 cells; 13-17s: 6 embryos,  
29 38 cells; 17-21s: 7 embryos, 59 cells). **h, i)** Number of contact events per h between  
30 BB and anterior membrane (**h**) or between BB and posterior membrane (**i**) in  
31 embryos filmed at different developmental stages: 4 to 8 s (5 embryos, 41 cells), 13

1 to 17 s (5 embryos, 25 cells) and 17 to 21 s (7 embryos, 32 cells). Cells with a BB in  
2 contact with the posterior membrane during the whole movie (points at 100% in  
3 Fig1g) were not plotted here. Statistical significance was assessed using a Wilcoxon  
4 test. *Scale bars: 2  $\mu$ m.*

5  
6 **Figure 2. Par3 forms patches and is asymmetrically localized in FP**  
7 **cells.**

8 **a, b)** Individual cells from dorsal views of 14 s stage embryos showing IF with a Par3  
9 antibody (a) or an antibody recognizing a phosphorylated form of Par3, BazP1085 (b)  
10 in FP cells. Two distinct cells are shown for each antibody. Both total Par3 and its  
11 phosphorylated form localize at apical junctions and are enriched at tricellular  
12 junctions (yellow arrowhead in a) and in patches at transverse membranes (white  
13 arrows), whether the BB is in contact with the posterior membrane (left images) or  
14 not (right). **c)** Representative images of isolated FP cells expressing Par3-RFP and  
15 Centrin-GFP at early (8 s, left) or late (17 s, right) stages. **d)** Par3-RFP  
16 posterior/anterior fluorescence intensity ratio in fully polarized FP cells (such as those  
17 displayed in c) at early and late stages. The red dotted line indicates a ratio of 1  
18 (corresponding to a symmetric Par3-RFP distribution) (comparison was done using a  
19 Wilcoxon test). **e-g)** Images of time-lapse movies showing individual FP cells from  
20 embryos mosaically expressing Par3-RFP (magenta) and centrin-GFP (green)  
21 (lateral view). Par3-RFP posterior/anterior fluorescence intensity ratio is plotted on  
22 the right plots (magenta curve) along with the polarization index (« p.i. », dashed blue  
23 curve). Black arrows on plots indicate the time-points corresponding to the images  
24 displayed on the left. **e)** FP cell with Par3 posterior enrichment in an embryo filmed  
25 between the 15 s and 17 s stages. Par3 posterior enrichment starts 20 min after the  
26 beginning of the movie (magenta arrow), 10 min before BB/posterior membrane  
27 contact (green arrow). **f)** FP cell with Par3 posterior enrichment in an embryo filmed  
28 between the 8 s and 10 s stages. Par3 posterior enrichment starts 20 min after the  
29 beginning of the movie (magenta arrow), 20 min before BB/posterior membrane  
30 contact (green arrow). **g)** FP cell with no posterior Par3 enrichment (Par3-RFP  
31 post/ant ratio close to 1) with a BB oscillating around the middle of the apical surface,  
32 in an embryo filmed between 17 s and 19 s. *Scale bars : 2 $\mu$ m.*

1  
2 **Figure 3. BB/Par3 patches exclusive contacts at early stages and Par3**  
3 **over-expression**

4 **a-c)** Images from time lapse movies of embryos mosaically injected with centrin-GFP  
5 (green), Membrane-GFP (green) and Par3-RFP (magenta) mRNAs. All pictures are  
6 dorsal views of FP cells. **a)** global view of 6 adjacent FP cells at the beginning of the  
7 movie shown in **b** ; white arrows point at Par3 patches (aligned along the AP axis)  
8 with which BB make contacts during the movie. The dotted frame indicates the  
9 position of the cell whose behavior is shown in **b**. **b)** example of a FP cell between  
10 the 4 and 5s stages, whose BB is in contact with the anterior Par3 patch at the  
11 beginning of the movie but then makes contact with the posterior Par3 patch that  
12 stretches in its direction (yellow arrows). A close up of BB and Par3 patches is shown  
13 for t=30'. **c)** Example of posterior and anterior membrane invaginations originating  
14 from Par3 patches and partially coated with Par3. Yellow arrows point to posterior  
15 (t=0') and anterior (t=64') invaginations. White arrowheads point to Par3 patches.  
16 Par3 patch deformation is more obvious at t=64' but is also present at t=0'. A close  
17 up of BB, Par3 patches and posterior membrane invagination is shown for t=0'. **d)**  
18 Polarization index (p.i., cf Fig1) of FP cells from embryos mosaically over-expressing  
19 either MbCherry (control) or Par3-RFP. We quantified both the polarization index of  
20 MbCherry or Par3-RFP positive cells and the polarization index of MbCherry or Par3-  
21 RFP negative cells. Scale bar : 2 $\mu$ m. Comparison was done using a Wilcoxon test.

22

23 **Fig. 4 Par3 clustering and localization in *vangl2*<sup>m209</sup> mutant FP**

24 **a)** Polarization index of *vangl2*<sup>m209/m209</sup> determined from immunostaining data (wt: 2  
25 embryos, 49 cells; *vangl2*<sup>m209/+</sup> 3 embryos, 66 cells; *vangl2*<sup>m209/m209</sup> 5 embryos, 57  
26 cells) **b)** Immunostaining of phosphorylated Par3 (BazP1085 antibody) in *vangl2*<sup>+/+</sup>  
27 (wt) and *vangl2*<sup>m209/m209</sup> mutant embryo FP at 18 s. In each case ZO1 staining was  
28 removed in the right image to reveal Par3 patches (yellow arrows). **c)** Quantification  
29 of the number of Par3 patches per cell on transverse membranes from  
30 immunostaining data as shown in **b**. **d)** The same method as in **c**. was used to  
31 extract phospho-Par3 patches prominence, defined as the height of Par3  
32 fluorescence peak relative to the highest and nearest valley (local fluorescence

1 minimum) (for each cell, prominence is normalized by the lowest Par3 intensity  
2 value). Right scheme: yellow arrows: tricellular junctions; white bar: orientation of the  
3 fluorescence measurement along the transverse membrane, star: position of Par3  
4 patch. In a-d, *vangl2*<sup>+/+</sup> : N=7, n=186 ; *vangl2*<sup>m209/+</sup> : N=5, n=112 ; *vangl2*<sup>m209/m209</sup> :  
5 N=7, n=129. **e, f)** Images from movies of 5s *vangl2*<sup>m209/m209</sup> embryos mosaically  
6 injected with Par3-RFP, Centrin-GFP and Membrane-GFP mRNA at the 16-32 cell  
7 stage. Yellow arrows point at contact events between Par3 patches and BBs. **g)**  
8 Percentage of cells displaying a lateral Par3-RFP patch in live-imaging experiments  
9 such as the one described in e,f. (*vangl2*<sup>+/+</sup> and *vangl2*<sup>m209/+</sup> : N=16, n=45 ;  
10 *vangl2*<sup>m209/m209</sup> : N=7, n=17). Statistical tests: Wilcoxon test for comparison of p.i. and  
11 prominence; Fisher test for comparison of patch number and percentage of cells with  
12 lateral patches.

13

14

## 1 SUPPLEMENTARY FIGURE LEGENDS

2

### 3 **Supplementary Figure S1: Further characterization of FP polarization in** 4 **space and time.**

5 **a** Quantification of FP polarization along the AP axis at 12 s. Analysis was performed  
6 on fixed immunostained embryos as described in Fig1a. (Wilcoxon test p-values for  
7 successive AP axis levels are: 0.6095, 0.5514, 0.3596, 0.3668, 0.5487, N=5,  
8 n=156 the difference between first and last AP axis levels were also small and non-  
9 statistically significant). **b** Still images from FP BB (green) and membrane (magenta)  
10 live imaging (dorsal view, start at 14s stage). The yellow arrow points to BB that will  
11 move and make contacts with the posterior membrane between 0 and 50 min after  
12 the movie started. White arrowheads point at BBs in adjacent cells that stay in  
13 contact with the posterior membrane during this time interval. **c** BB speed measured  
14 from live-imaging data at different developmental stages. The speed of each BB  
15 movement was calculated by dividing the value of BB/posterior membrane variations  
16 (corresponding to green curves in Fig1 c-f) by the total duration of the movement (4-  
17 8s: 4 embryos, 38 cells; 13-17s: 6 embryos, 22 cells; 17-21s: 7 embryos, 32 cells).  
18 Comparison between stages was done using a Wilcoxon test. **d** Still images from a  
19 movie of a 5 s to 7 s stage embryo injected with centrin-GFP (green) and MbCherry  
20 (magenta) showing a dividing FP cell. Yellow arrows point at the BB of the anterior  
21 daughter cell, which rapidly moves back to the posterior membrane after cytokinesis.  
22 **e** Movies described in Fig1 were used to quantify BB direction change frequency,  
23 mean duration of BB/posterior membrane contact events as a percentage of total  
24 imaging duration and mean polarization index during live-imaging. Plots in the first  
25 line take into account the BBs that stay in contact with the posterior membrane 100%  
26 of movie duration (posteriorly docked BBs) whereas the second line only represents  
27 BBs that are not posteriorly docked. Comparison between stages was done using a  
28 Wilcoxon test. Scale bar : 2 $\mu$ m.

29

### 30 **Supplementary Figure S2: Membrane invaginations link BBs to** 31 **transverse membranes during FP polarization**

1 **a, b)** Left : images taken from live-imaging data such as those presented in Fig. 1.  
2 Yellow arrows : potential cilia. Time (in minutes) is indicated in the upper-left corner.  
3 Right : count of transverse membrane invagination events in FP cells at early (before  
4 14s) and late stages (after 14s). **a** shows a posterior membrane invagination (white  
5 arrows); **b** shows an anterior membrane invagination (white arrow). Short mbCherry-  
6 positive digitations, presumably corresponding to cilia, were in some cases  
7 associated to the BB opposite the invagination (yellow arrowheads in **a** and **b**). These  
8 membrane digitations were rare in late stage embryos (6/57 cells out of 10 embryos)  
9 compared to early embryos (44/68 cells from 9 embryos), suggesting that Mb-Cherry  
10 entry into cilia is less common at later stages, which could reflect a maturation of the  
11 ciliary gate. **c)** Number of timepoints where anterior or posterior invaginations were  
12 detected in time-lapse movies with a 5 minutes interval between images (10  
13 embryos, 24 cells, Wilcoxon test) **d)** Behavior of BB immediately after formation of an  
14 anterior or posterior invagination: BB either moved anteriorly ('ant'), posteriorly  
15 ('post') or did not move ('immobile') (50 posterior and 14 anterior invaginations from  
16 16 embryos, 35 cells, Fisher test).

17

### 18 **Supplementary Figure S3: *Par3ab* morphants or mutants have normal** 19 **FP polarization and Par3 patches**

20 **a)** FP polarization index (p.i.) in non-injected (NI) and *Par3ab* morpholino (MO)-  
21 injected embryos at 18s stage (NI : N=9, n=171 ; *Par3MO* : N=16, n=244). **b)**  
22 BazP1085 patch prominence (left) and number (right) in NI and *Par3ab* MO injected  
23 embryos at 18s stage (NI : N=4, n=66 ; *Par3MO* : N=3, n=38). **c)** p.i. of maternal  
24 zygotic heterozygous (*MZPar3ab<sup>+/-</sup>*) or homozygous (*MZPar3ab<sup>-/-</sup>*) *Par3ab* mutants at  
25 18s stage (*MZPar3ab<sup>+/-</sup>* : N=7, n=106 ; *MZPar3ab<sup>-/-</sup>* : N=9, n=152). **d)** *Par3* patches  
26 prominence (left) and number (right) in maternal zygotic heterozygous (*MZPar3ab<sup>+/-</sup>*)  
27 or homozygous (*MZPar3ab<sup>-/-</sup>*) *Par3ab* mutants at 18s stage (*MZPar3ab<sup>+/-</sup>* : N=3,  
28 n=27 ; *MZPar3ab<sup>-/-</sup>* : N=3, n=59). **e)** Immunostaining of FP cells over-expressing  
29 *Par3*-RFP in embryos mosaically injected with *Par3*-RFP mRNA at the 16 cells stage  
30 (dorsal view, 18 s stage). *Par3* or BazP1085 patches number compared with Fisher's  
31 exact test. **f)** Immunostaining of FP cells not injected (NI) or injected with *Par3ab*



1 morpholino (Par3abMO) showing the equivalent amount of BazP1085 staining in both  
2 conditions. **g)** Immunostaining of FP cells in MZPar3ab<sup>+/-</sup> and MZPar3ab<sup>-/-</sup> showing  
3 the equivalent amount of Par3 in both genotypes.

4  
5  
6  
7

## 8 SUPPLEMENTARY MOVIES LEGENDS

9

10 Filename: Supplementary movie 1

11 Description: **Live imaging of a BB bouncing off the posterior membrane in**  
12 **an early-stage FP cell.** wt embryos were injected with Centrin-GFP (green) and  
13 membrane-Cherry (magenta) mRNAs at the one-cell stage. White arrows indicate the  
14 position of the BB at the first and last time-points. Images were taken every 5  
15 minutes during the 6 s to 9 s stages time-frame. Dorsal view. Corresponds to Fig1c.

16  
17

18 Filename: Supplementary movie 2

19 Description: **Live imaging of a BB bouncing off posterior and anterior**  
20 **membranes in an early-stage FP cell.** wt embryos were injected with Centrin-  
21 GFP (green) and membrane-Cherry (magenta) mRNAs at the one-cell stage. White  
22 arrows indicate the position of the BB at the first and last time-points. Images were  
23 taken every 5 minutes during the 6 s to 9 s stages time-frame. Dorsal view.  
24 Corresponds to Fig1d.

25

26 Filename: Supplementary movie 3

27 Description: **Live imaging of a BB staying in contact with the posterior**  
28 **membrane in a late-stage FP cell.** wt embryos were injected with Centrin-GFP  
29 (green) and membrane-Cherry (magenta) mRNAs at the one-cell stage. White arrows  
30 indicate the position of the BB at the first and last time-points. Images were taken  
31 every 5 minutes during the 18 s to 21 s stages time-frame. Dorsal view. Corresponds  
32 to Fig1e.

33

34 Filename: Supplementary movie 4

35 Description: **Live imaging of BB bouncing against the posterior membrane**  
36 **in a late-stage FP cell.** wt embryos were injected with Centrin-GFP (green) and  
37 membrane-Cherry (magenta) mRNAs at the one-cell stage. White arrows indicate the  
38 position of the BB at the first and last time-points. Images were taken every 5  
39 minutes during the 18 s to 21 s stages time-frame. Dorsal view. Corresponds to  
40 Fig1f.

41

42

43 Filename: Supplementary movie 5

44 Description: **Live imaging of the rapid repolarization of the anterior**  
45 **daughter cell after FP cell division.** wt embryos were injected with Centrin-GFP  
46 (green) and membrane-Cherry (magenta) mRNAs at the one-cell stage. White arrows

1 (at the beginning, middle and end of the movie) point at the BB of the anterior  
2 daughter cell, which rapidly moves back to the posterior membrane after cytokinesis.  
3 Images were taken every 2 minutes during the 5 s to 7 s stages time-frame. Dorsal  
4 view. Corresponds to FigS1d.

5

6 Filename: Supplementary movie 6

7 Description: **Live imaging of BB movements in a FP cell displaying a**  
8 **membrane invagination between BB and the posterior membrane** (yellow  
9 arrow at t=115 min). wt embryos were injected with Centrin-GFP (green) and  
10 membrane-Cherry (magenta) mRNAs at the one-cell stage. White arrows point at the  
11 BB. Images were taken every 5 minutes during the 6 s to 9 s stages time-frame.  
12 Dorsal view. Corresponds to FigS2a.

13

14 Filename: Supplementary movie 7

15 Description: **Live imaging of BB movements in a FP cell displaying a**  
16 **membrane invagination between BB and the anterior membrane** (yellow  
17 arrow at t=18 min). wt embryos were injected with Centrin-GFP (green) and  
18 membrane-Cherry (magenta) mRNAs at the one-cell stage. Membrane invaginations  
19 between the posterior membrane and BB can also be seen at t=10min, t=26min and  
20 t=66min. White arrows point at the BB. Images were taken every 2 minutes during  
21 the 8 s to 10 s stages time-frame. Dorsal view. Corresponds to FigS2b.

22

23 Filename: Supplementary movie 8

24 Description: **Live imaging of BB movements and Par3-RFP localization in**  
25 **a polarizing FP cell**. wt embryos mosaically expressing Centrin-GFP (green) and  
26 Par3-RFP (magenta). White arrows point at the BB at t=0 and at t=30 min, when the  
27 BB touches the posterior membrane. Images were taken every 2 min during the 15 s  
28 to 17 s stages time-frame. Lateral view. Corresponds to Fig2e.

29

30 Filename: Supplementary movie 9

31 Description: **Live imaging of BB movements and Par3-RFP localization in**  
32 **a polarizing FP cell**. wt embryos mosaically expressing Centrin-GFP (green) and  
33 Par3-RFP (magenta). White arrows point at the BB at t=0 and at t=60 min, when the  
34 BB touches the posterior membrane. Images were taken every 4 min during the 8 s  
35 to 10 s stages time-frame. Dorsal view. Corresponds to Fig2f.

36

37

38

39 Filename: Supplementary movie 10

40 Description: **Live imaging of BB movements and Par3-RFP localization in**  
41 **a non-polarizing FP cell**. wt embryos mosaically expressing Centrin-GFP (green)  
42 and Par3-RFP (magenta). White arrows point at the BB at the beginning and end of  
43 movie. Images were taken every 5 minutes during the 17 s to 19 s stages time-frame.  
44 Lateral view. Corresponds to Fig2f.

45

46 Filename: Supplementary movie 11

47 Description: **Live imaging of BB/Par3 patch contacts in an early-stage FP**  
48 **cell**. wt embryo mosaically expressing Centrin-GFP, Membrane-GFP (green) and

1 Par3-RFP (magenta). White arrows point at the BB at the beginning of the movie,  
2 when the BB is in contact with the anterior Par3 patch, at t=30 min when it makes a  
3 contact with the posterior Par3 patch and at the end of the movie. Images were taken  
4 every 2 min during the 4 s to 5 s stages time-frame. Dorsal view. Corresponds to  
5 Fig3b.

6  
7 Filename: Supplementary movie 12

8 Description: **Live imaging of membrane invaginations at the level of Par3**  
9 **patches in early stage FP cells.** wt embryo mosaically expressing Centrin-GFP,  
10 Membrane-GFP (green) and Par3-RFP (magenta). White arrows point at the BB at  
11 the beginning and at the end of the movie. Yellow arrows at t=0 and t=68 min point at  
12 membrane invaginations originating from the posterior and the anterior Par3 patches,  
13 respectively. Images were taken every 4 min during the 7 s to 8 s stages time-frame.  
14 Dorsal view. Corresponds to Fig3c.

15  
16 Filename: Supplementary movie 13

17 Description: **Live imaging of BB/lateral Par3 patch contacts in an early-**  
18 **stage FP cell of a *vangl2*<sup>m209/m209</sup> mutant.** *vangl2*<sup>m209/m209</sup> embryo mosaically  
19 expressing Centrin-GFP, Membrane-GFP (green) and Par3-RFP (magenta). White  
20 arrows point at the BB at the beginning and at the end of the movie. Images were  
21 taken every 4 min during the 5 s to 6 s stages time-frame. Dorsal view. Corresponds  
22 to Fig4e.

23  
24 Filename: Supplementary movie 14

25 Description: **Live imaging of BB/posterior Par3 patch contacts in an early-**  
26 **stage FP cell of a *vangl2*<sup>m209/m209</sup> mutant.** *vangl2*<sup>m209/m209</sup> embryo mosaically  
27 expressing Centrin-GFP, Membrane-GFP (green) and Par3-RFP (magenta). White  
28 arrows point at the BB at the beginning and at the end of the movie. Images were  
29 taken every 4 min during the 5 s to 6 s stages time-frame. Dorsal view. Corresponds  
30 to Fig4f.

31  
32  
33

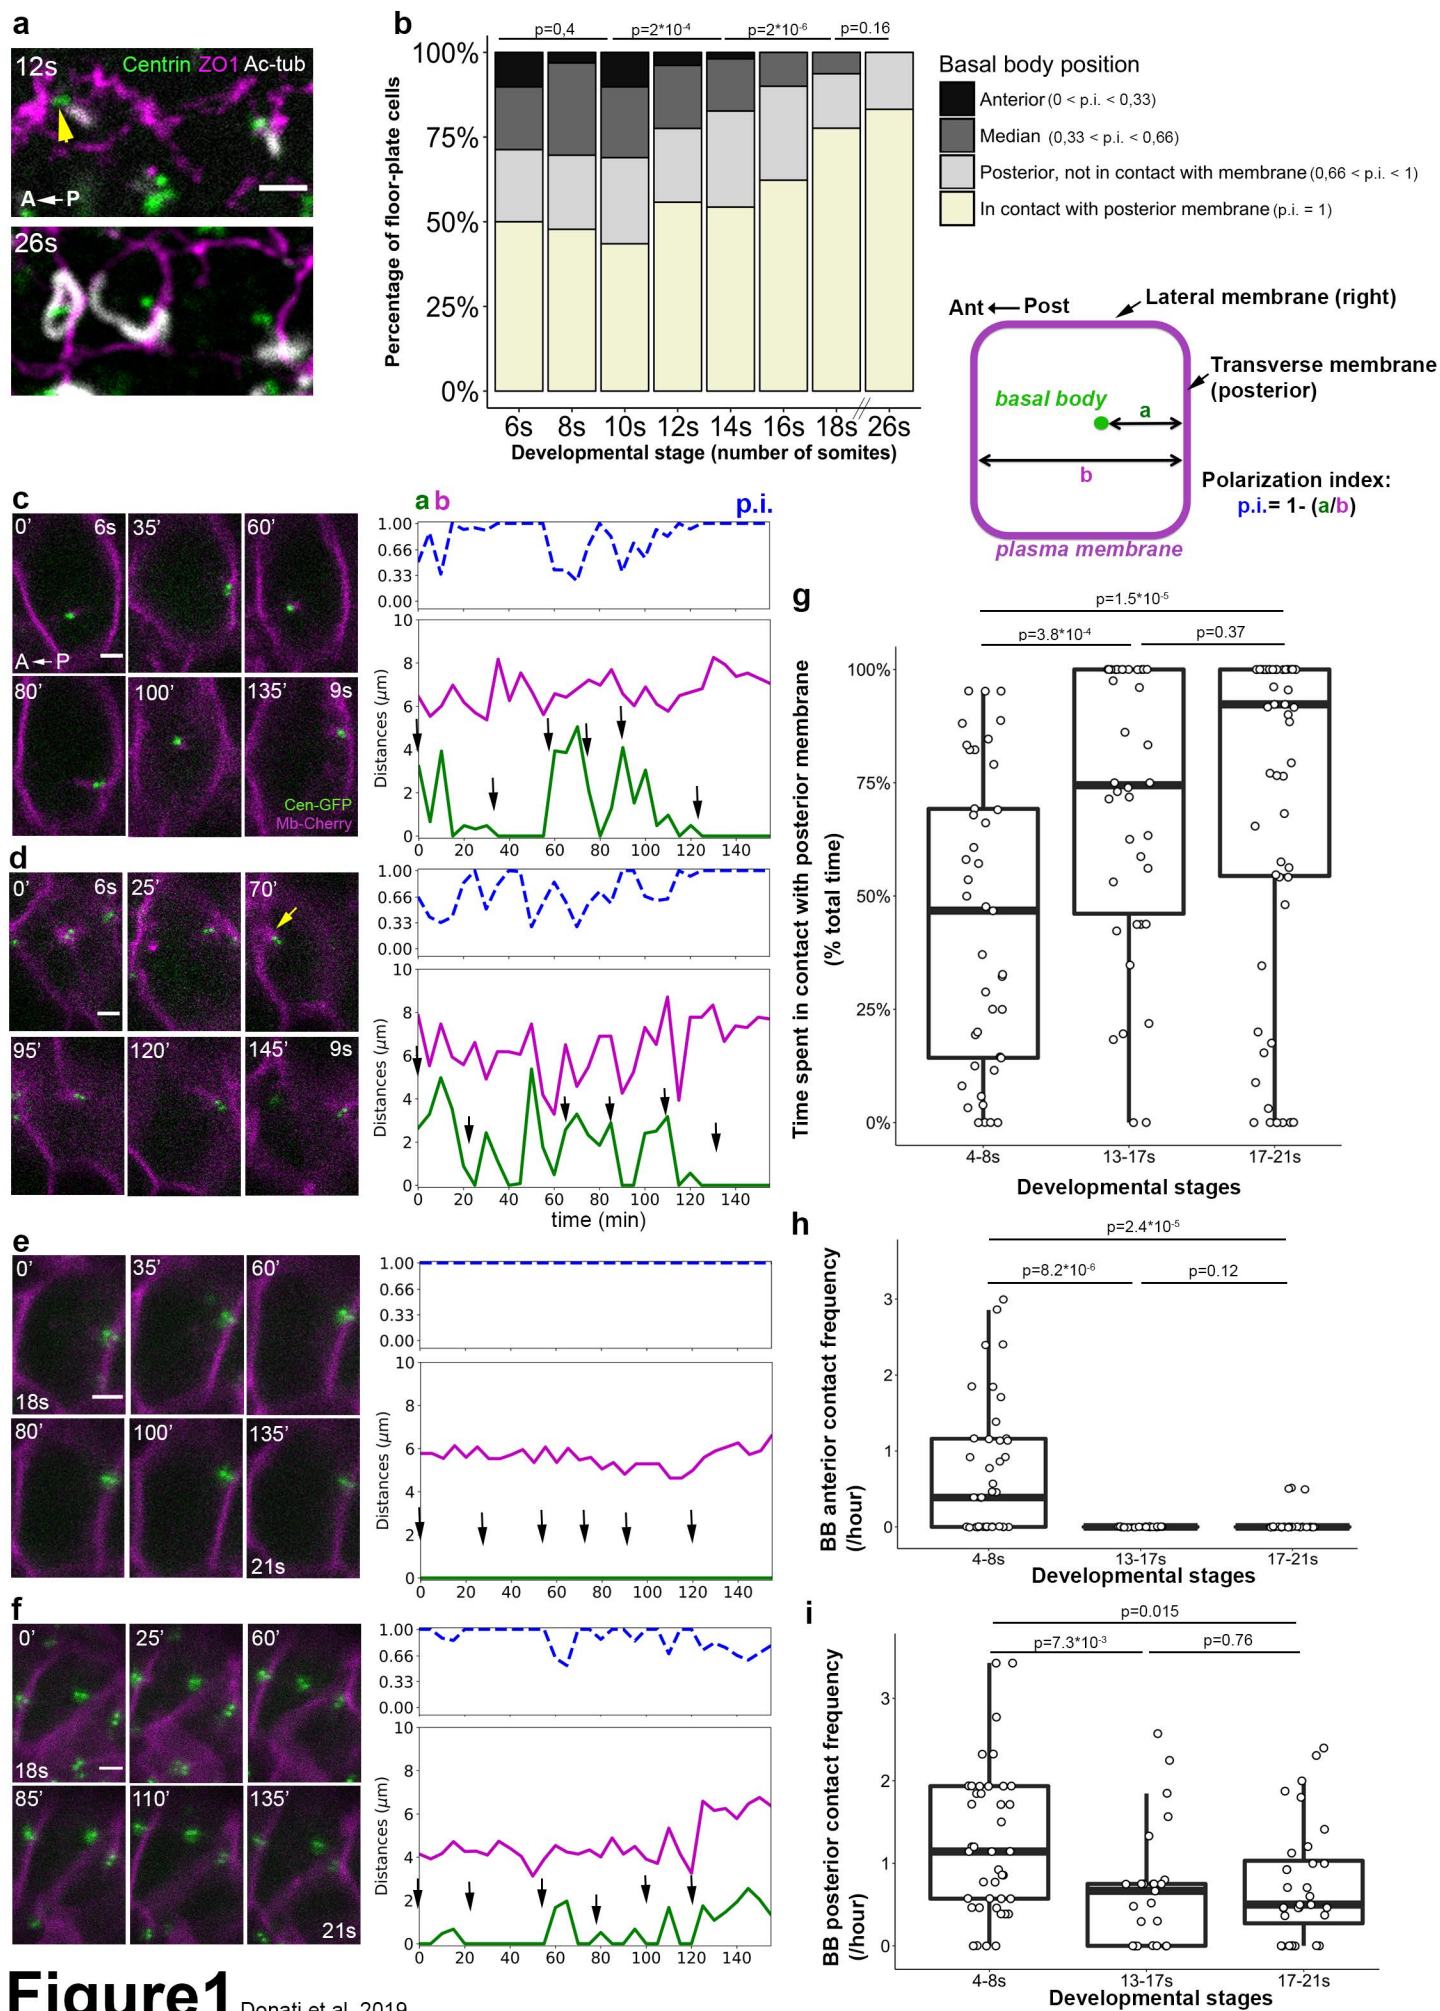

**Figure 1** Donati et al. 2019

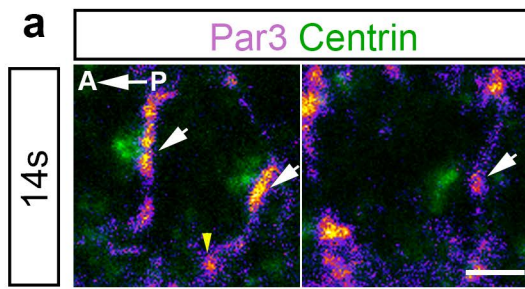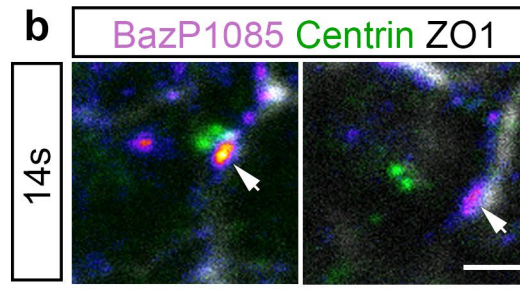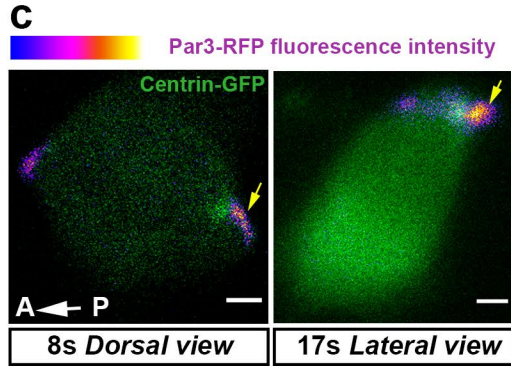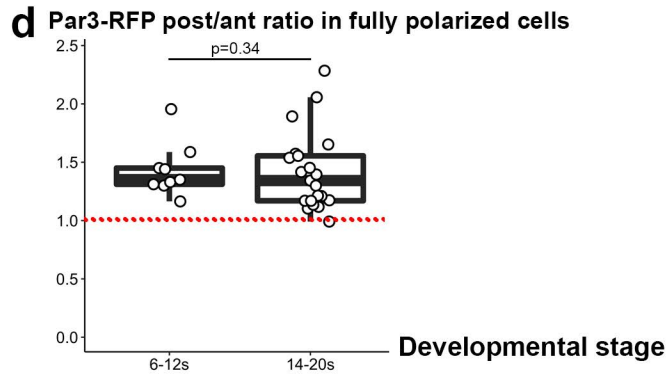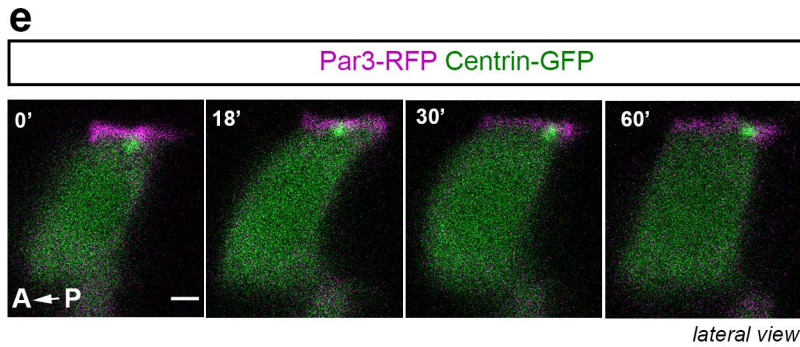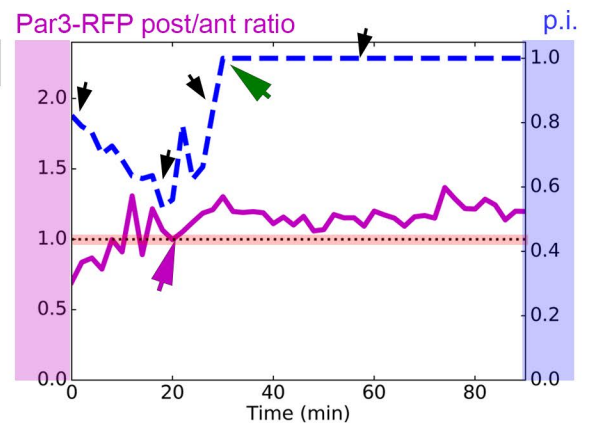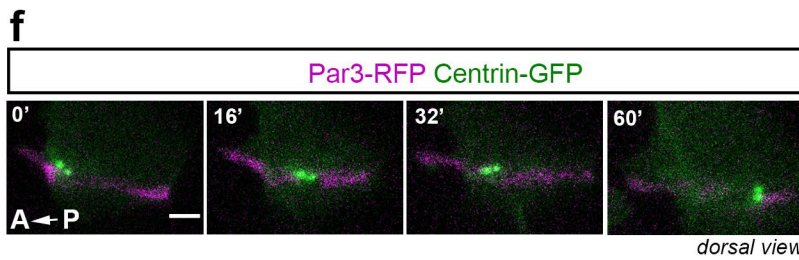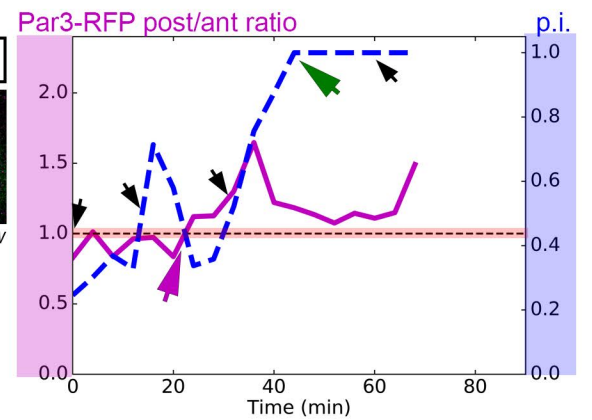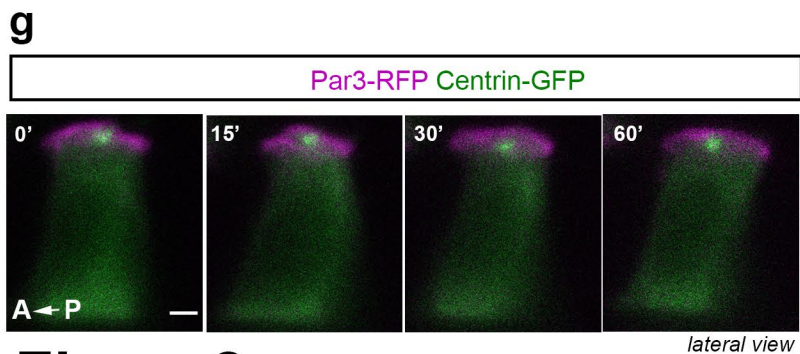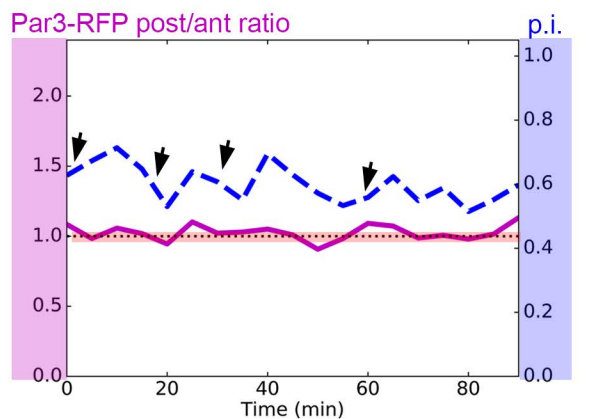

**Figure2** Donati et al. 2019

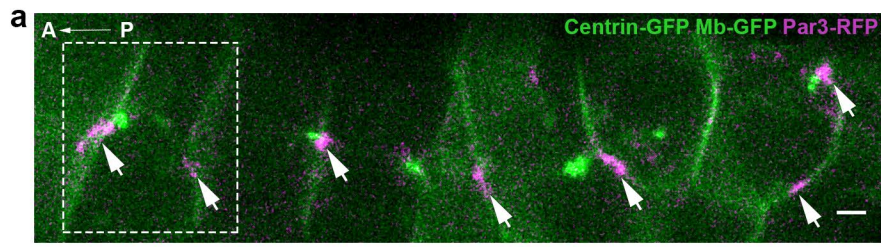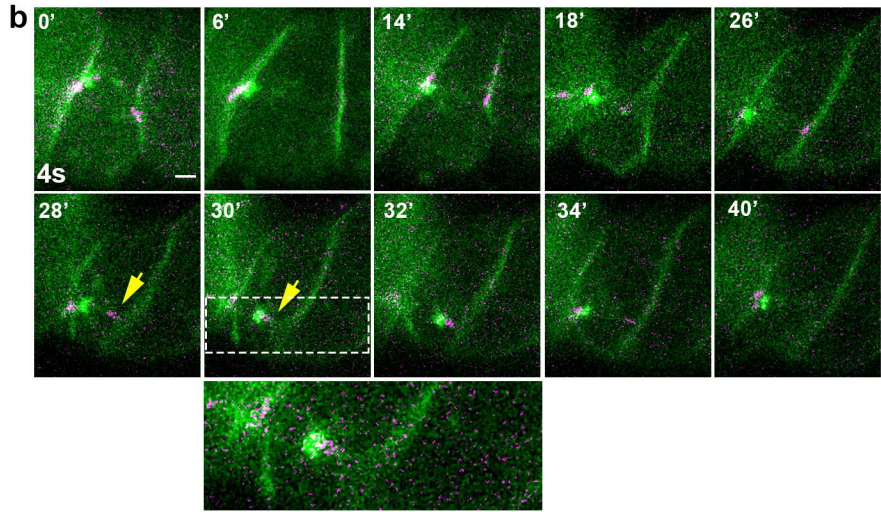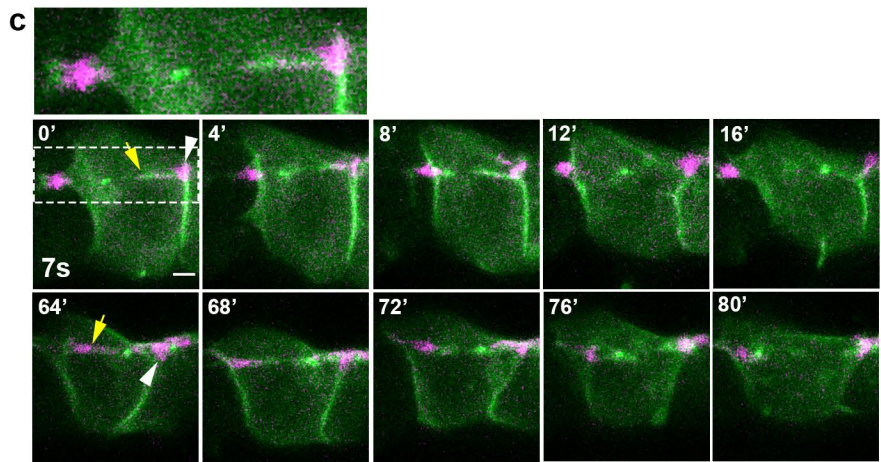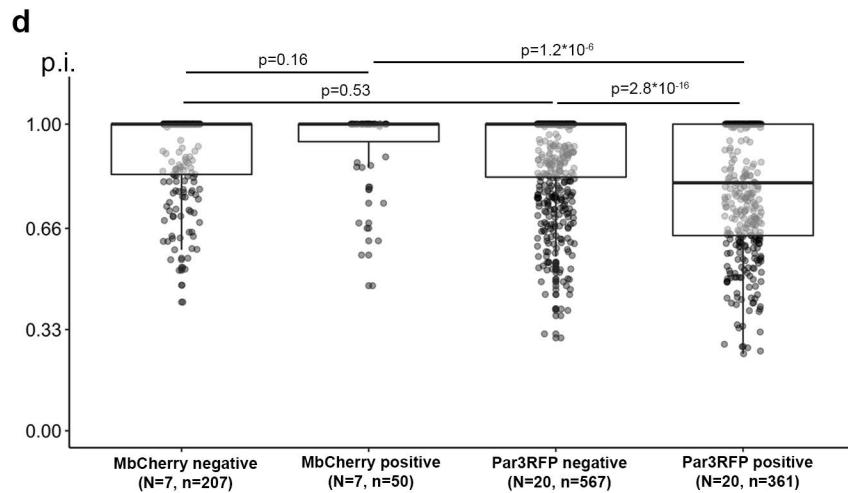

**Figure3** Donati et al. 2019

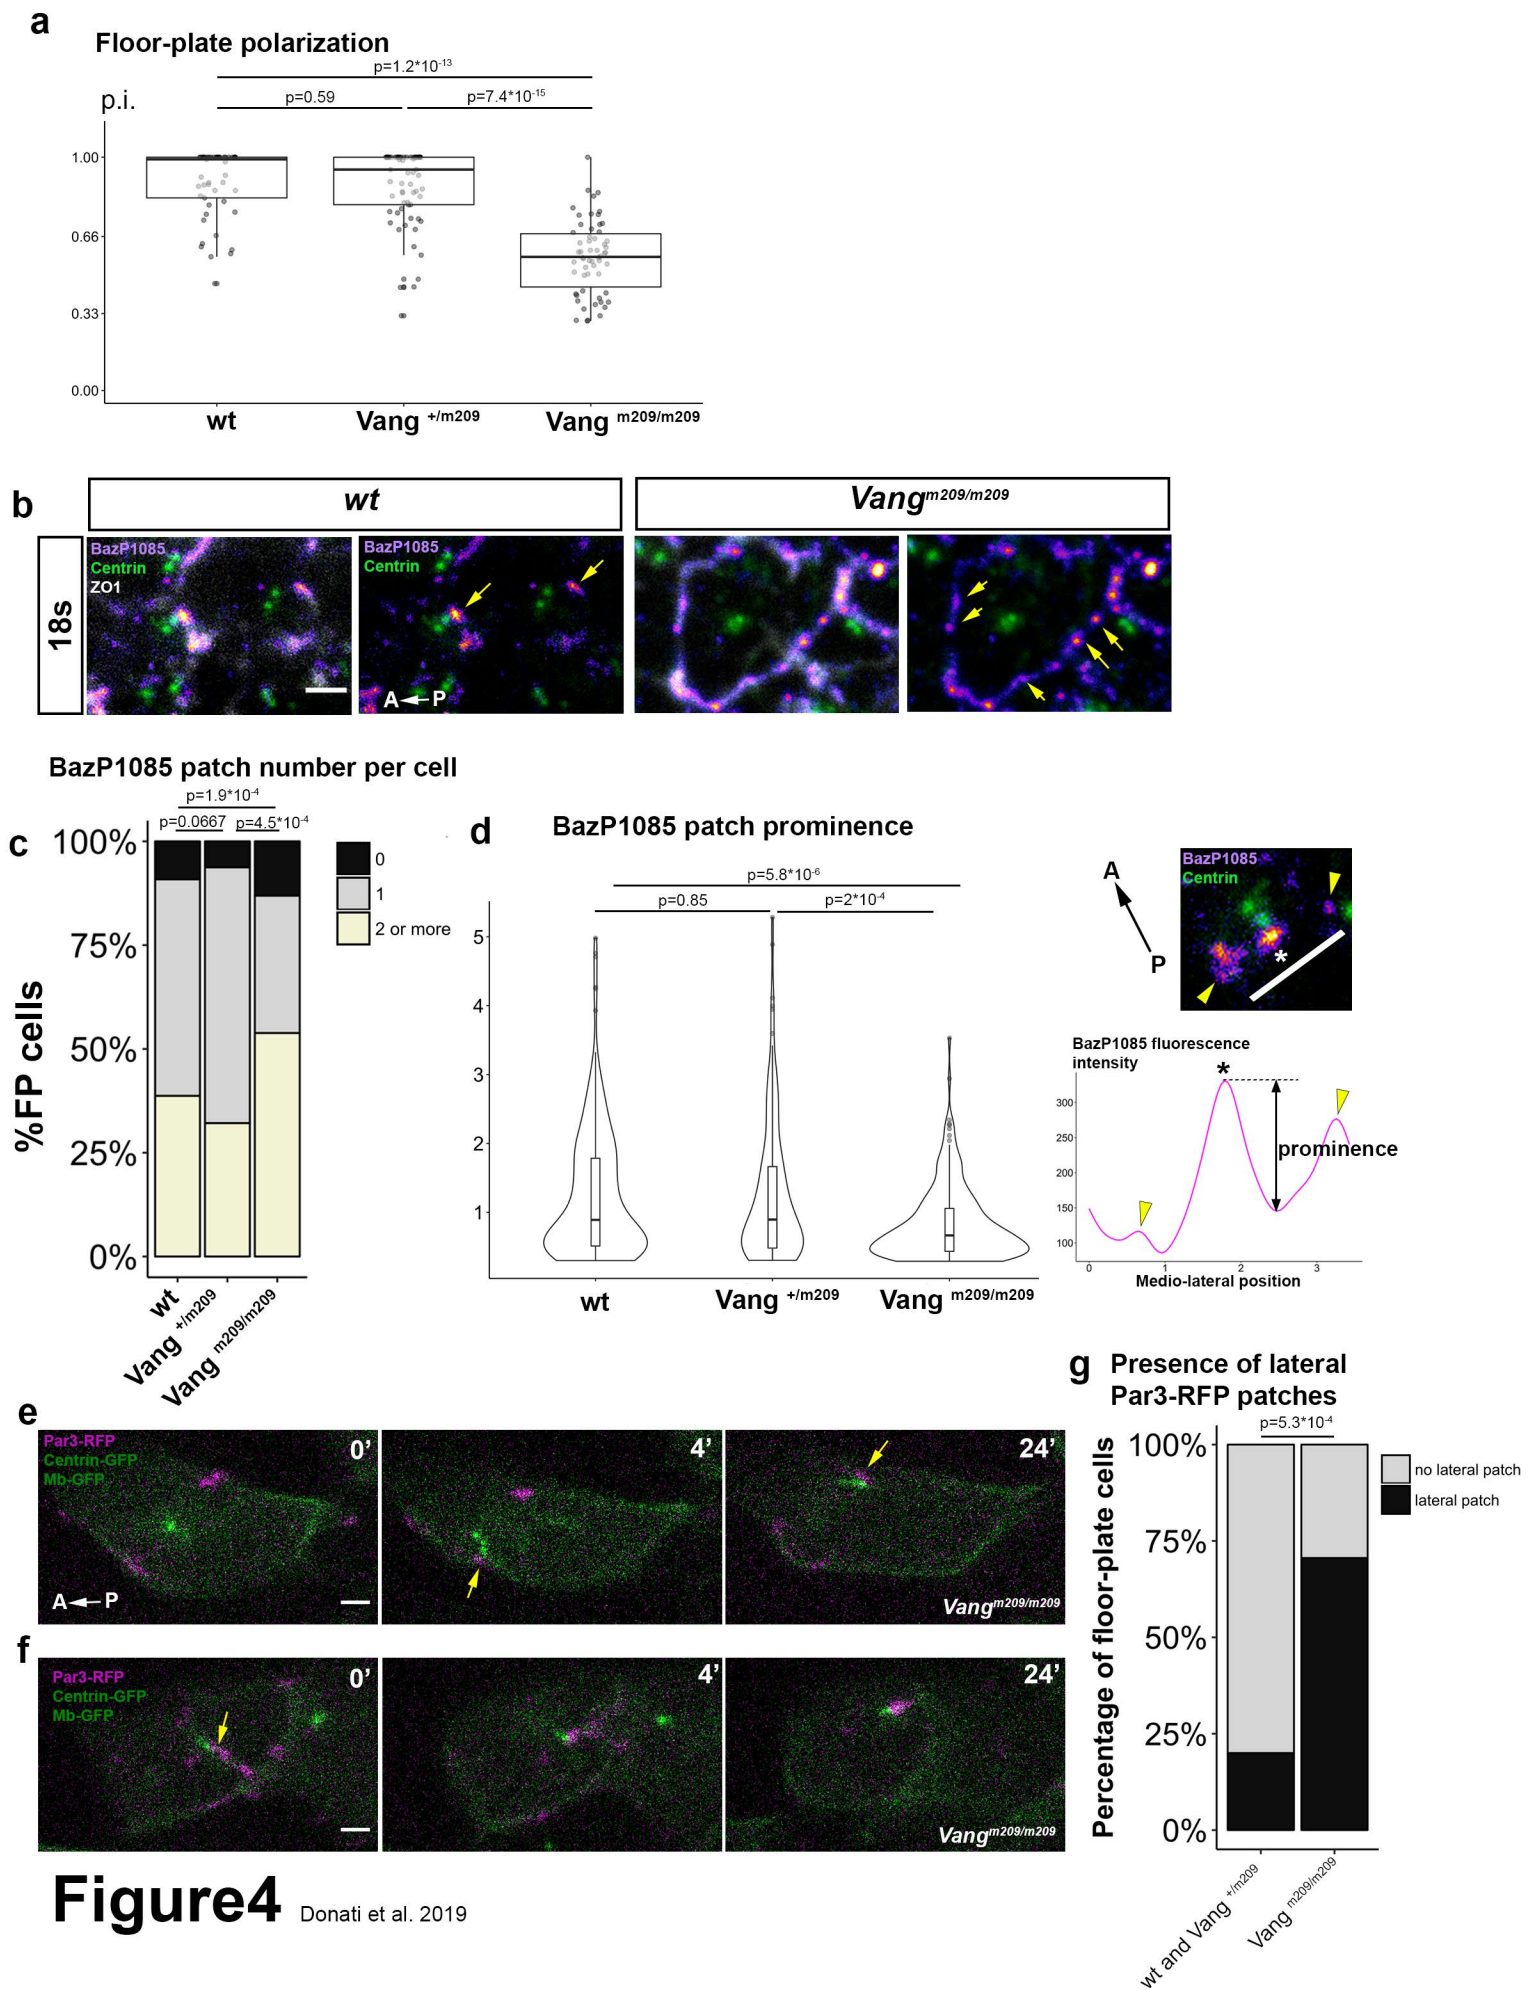

**Figure 4** Donati et al. 2019

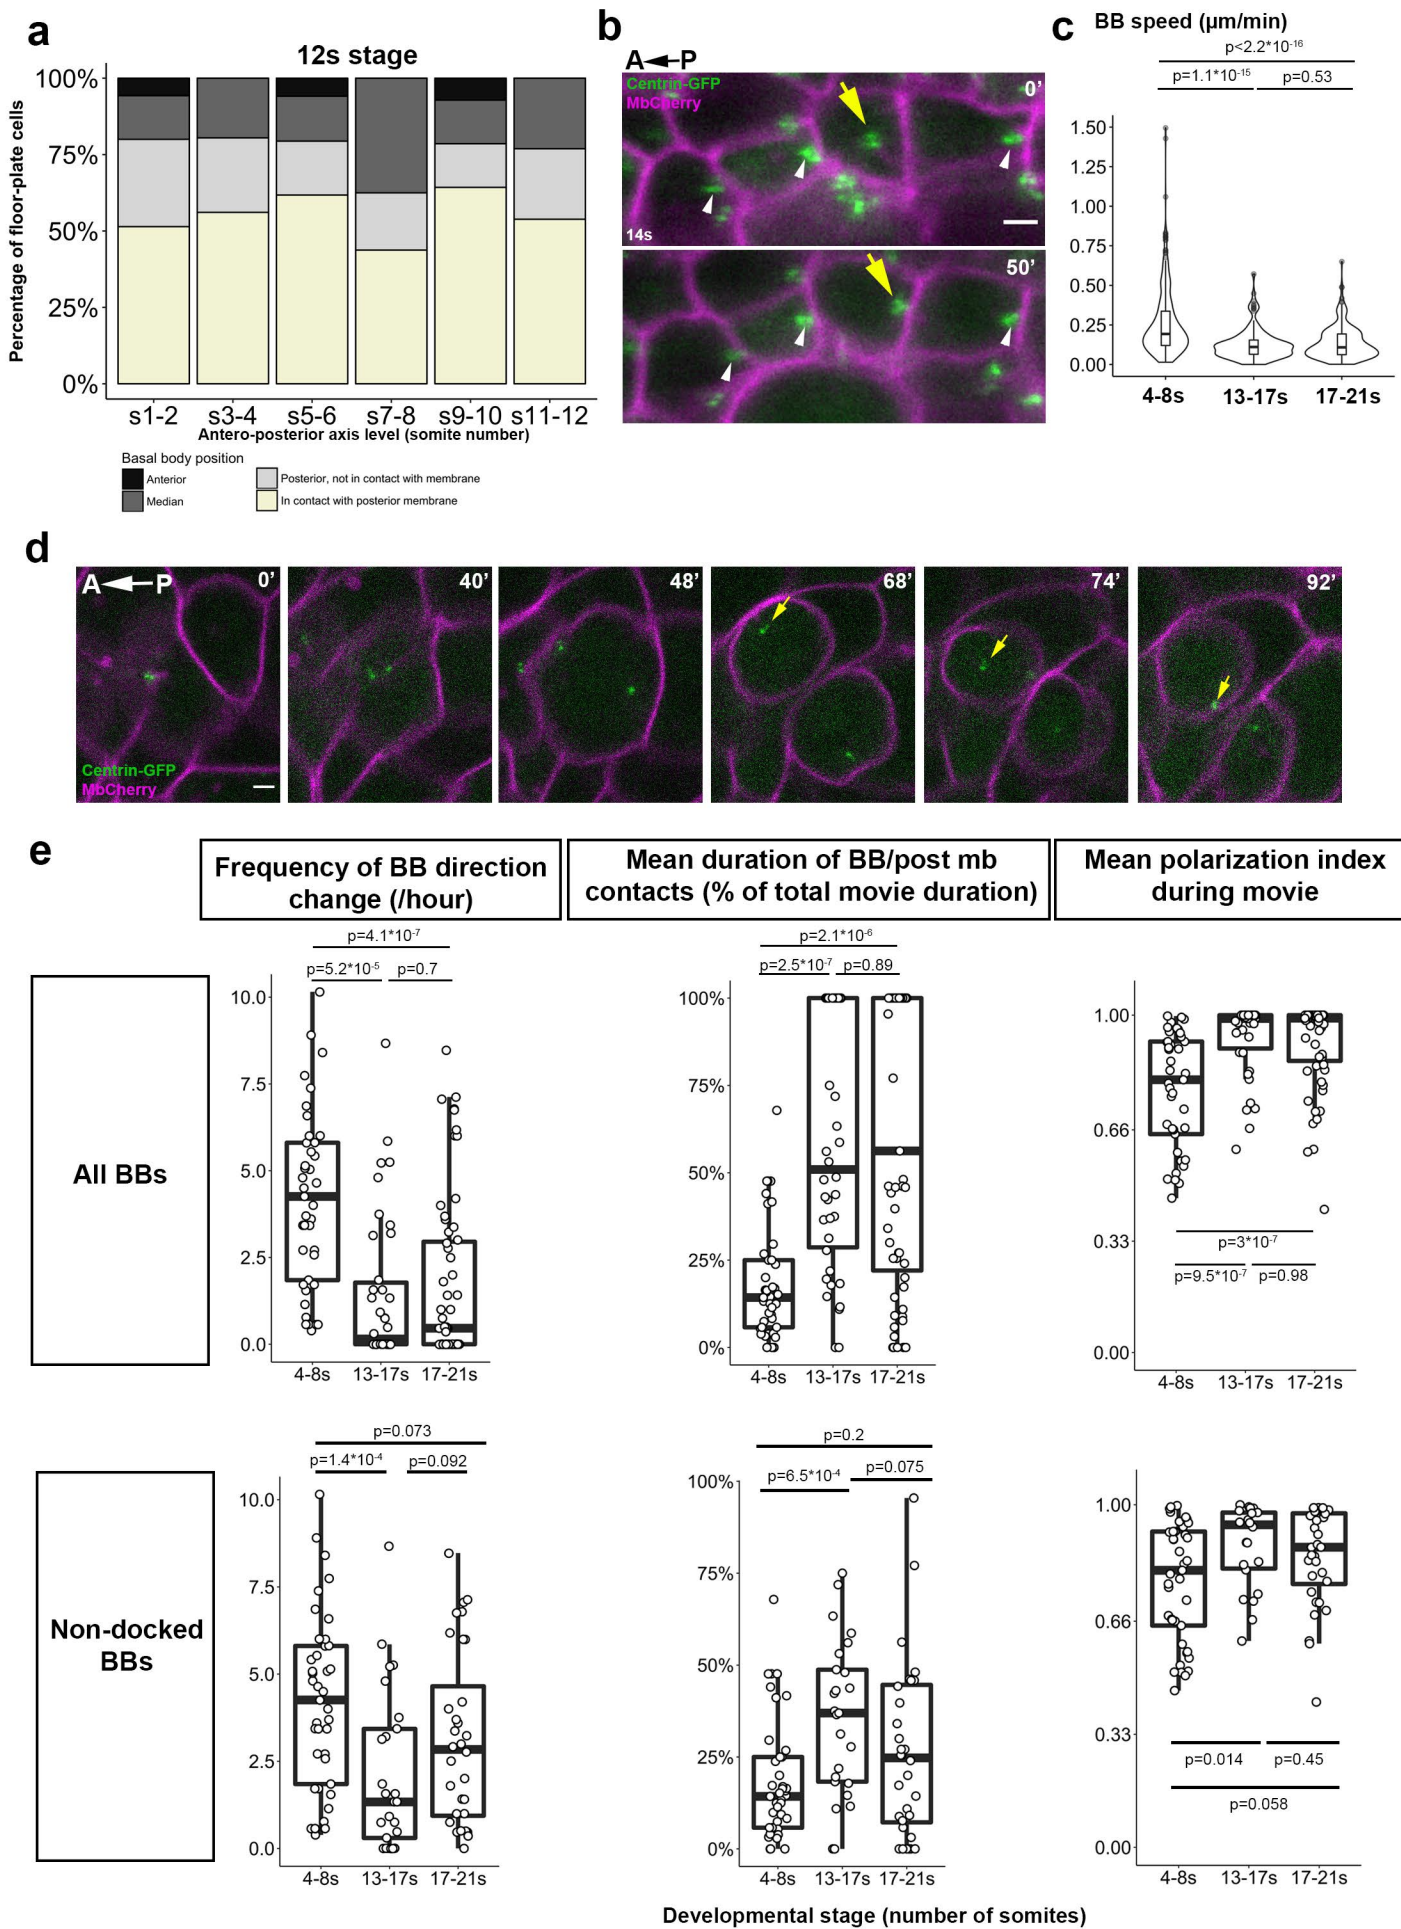

**FigureS1** Donati et al. 2019



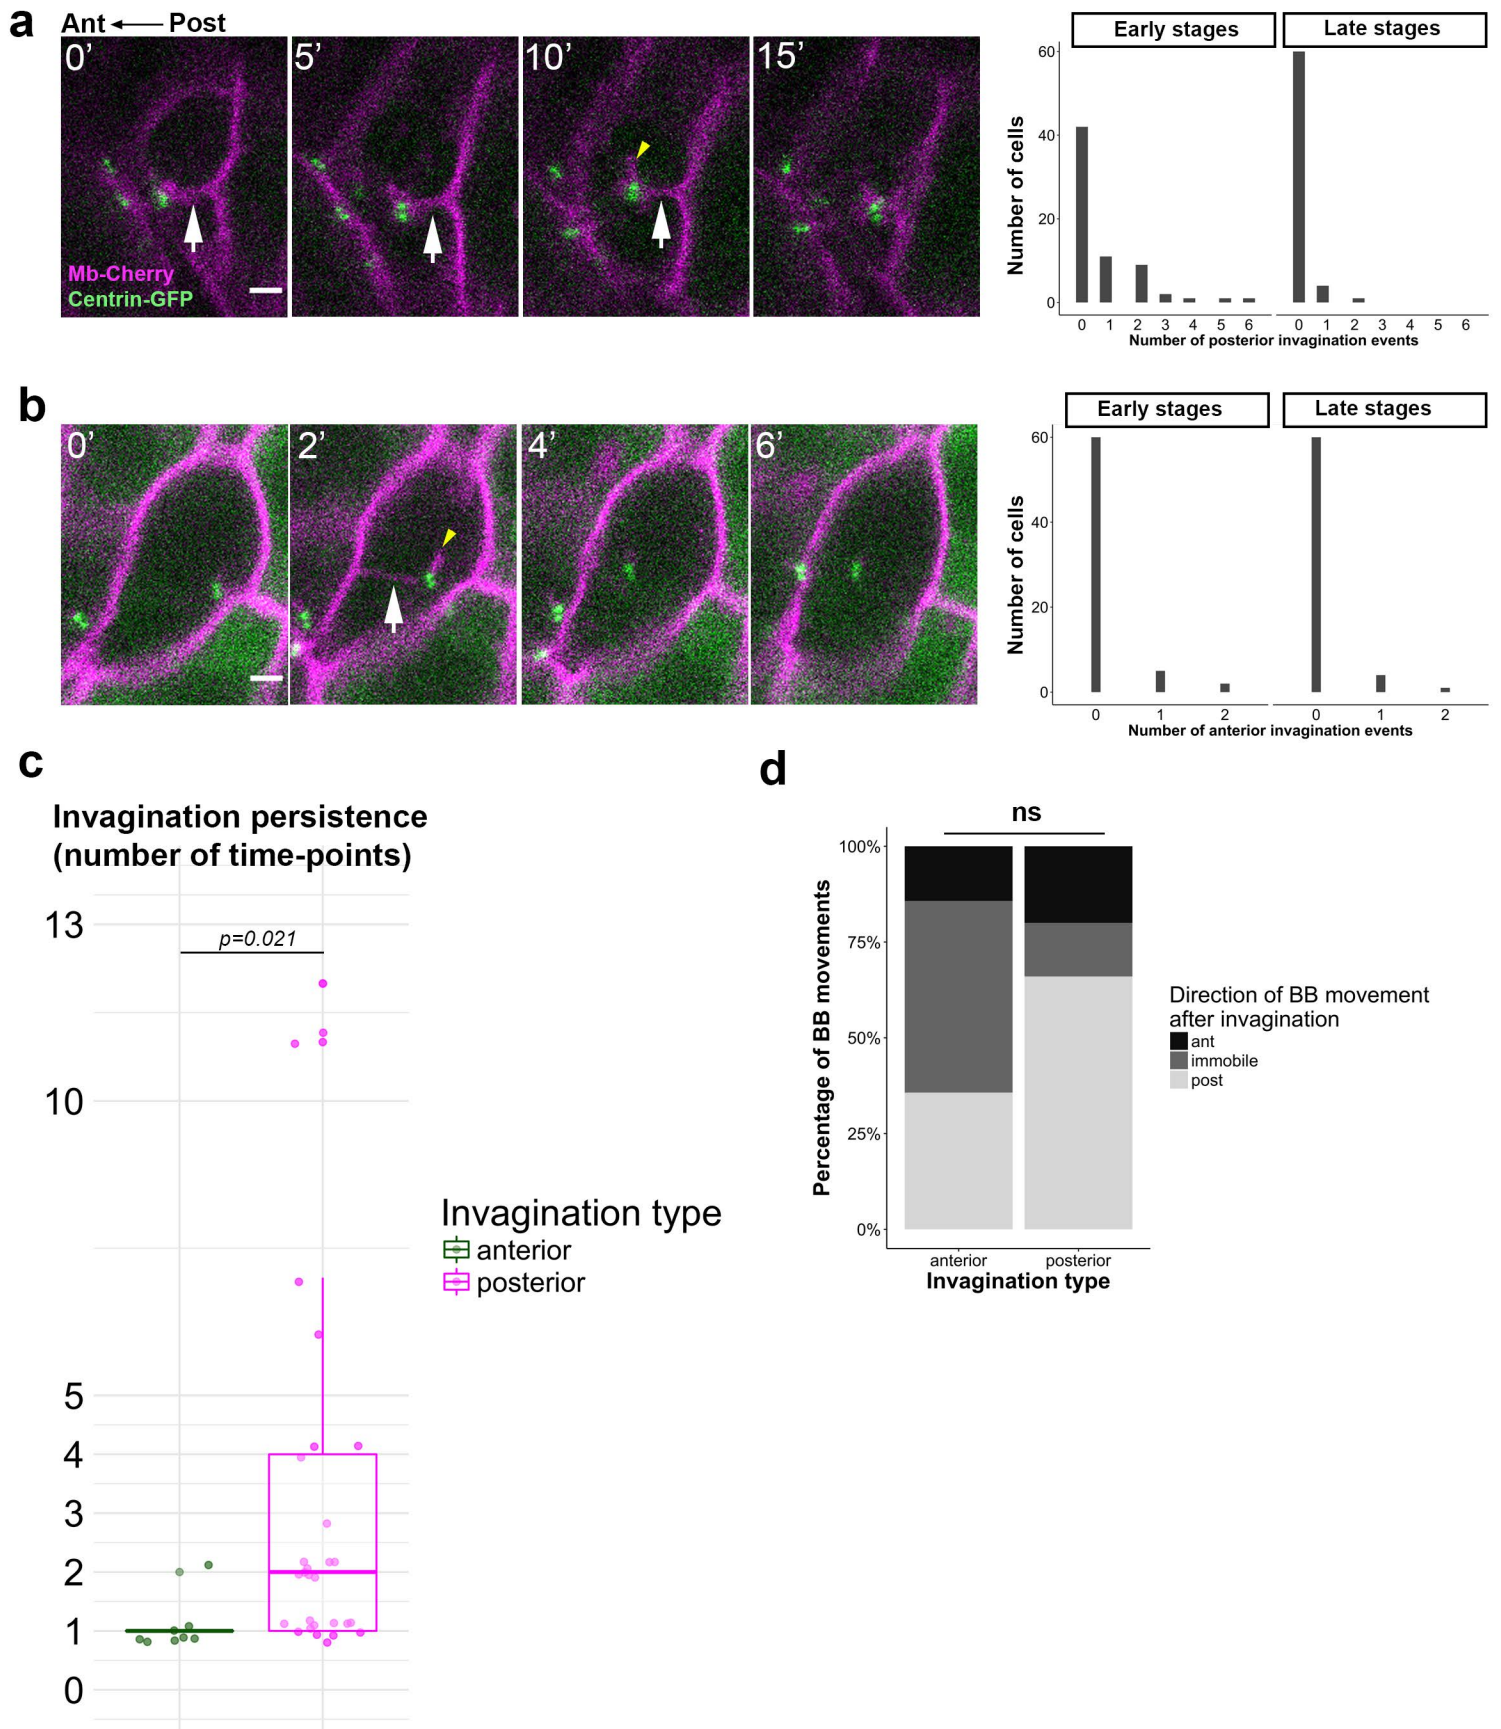

**FigureS2** Donati et al. 2019

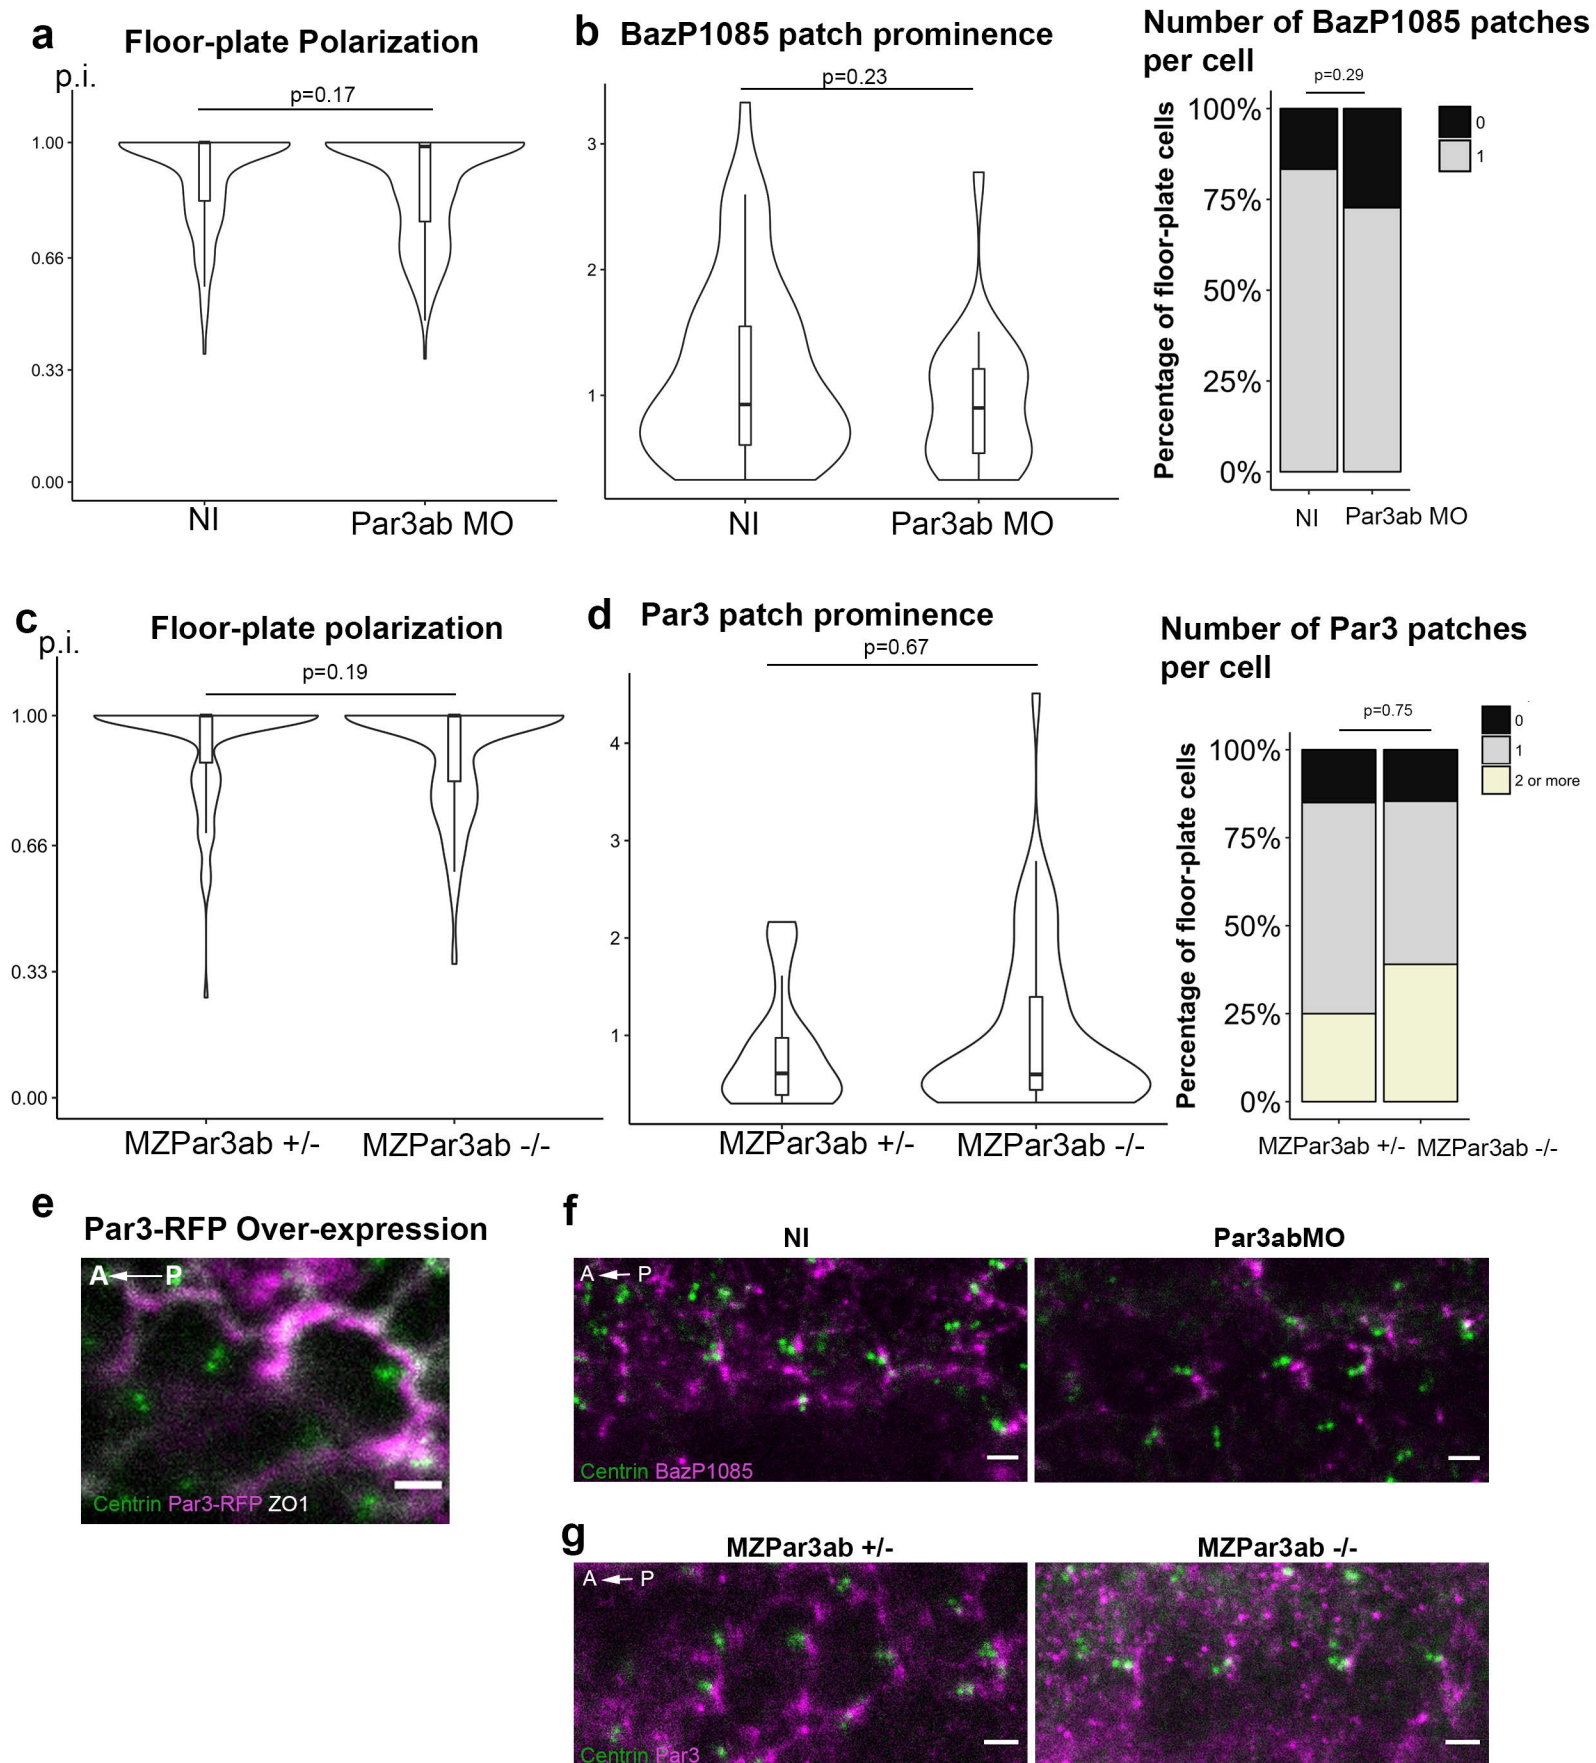

**Figure S3** Donati et al.2019
